# Supplementary material for: Strength and limits of transient mid to late Holocene simulations with dynamical vegetation
Source: Copernicus journal article supplement (doi:10.5194/cp-2018-140), 2018-11-02
Supplement: Supplementary file [file cp-2018-140-AC1-supplement.pdf]

# Strength and limits of transient mid to late Holocene simulations with dynamical vegetation

Pascale Braconnot\*, Dan Zhu, Olivier Marti and Jérôme Servonnat

IPSL/Laboratoire des Sciences du Climat et de l'Environnement, unité mixte CEA-CNRS-UVSQ, Université Paris Saclay, Bât. 714, Orme de Merisiers, 91191 Gif-sur-Yvette Cedex.

*Correspondance to* : pascale.braconnot@lscce.ipsl.fr

**Abstract.** We discuss here the first 6000 years long Holocene simulations with fully interactive vegetation and carbon cycle with the IPSL Earth system model. It reproduces the long term trends in tree line in northern hemisphere and the southward shift of Afro-Asian monsoon precipitation in the tropics in response to orbital forcing. The simulation is discussed at the light of a set of mid Holocene and pre industrial simulations performed to set up the model version and to initialize the dynamical vegetation. These sensitivity experiments remind us that model quality or realism is not only a function of model parameterizations and tuning, but also of experimental set up. They also question the possibility for bi-stable vegetation states under modern conditions. Despite these limitations the results show different timing of vegetation changes through space and time, mainly due to the pace of the insolation forcing and to internal variability. Forest in Eurasia exhibits changes in forest composition with time as well as large centennial variability. The rapid increase of atmospheric CO<sub>2</sub> in the last centuries of the simulation contributes to enhance tree growth and counteracts the long term trends induced by Holocene insolation in the northern hemisphere. A complete evaluation of the results would require being able to properly account for systematic model biases and, more important, a careful choice of the reference period depending on the scientific questions.

## 1 Introduction

Past environmental records such as lake levels or pollen records highlight substantial changes in the global vegetation cover during the Holocene (COHMAP-Members, 1988; Wanner et al., 2008). The early to mid-Holocene optimum period was characterized by a northward extension of boreal forest over north Eurasia and America which attests for increased temperature in mid to high latitudes (Prentice and Webb, 1998). The early to mid-Holocene has also seen a massive expansion of moisture and precipitation in Afro-Asian regions that have been related to enhance boreal summer monsoon (Jolly et al., 1998; Lezine et al., 2011). These changes were triggered by latitudinal and seasonal changes in top of the atmosphere (TOA) incoming solar radiation caused by the long term variation in Earth's orbital parameters (Berger, 1978). During the course of the Holocene these features retreated towards their modern distribution (Wanner et al., 2008). While global data syntheses exist for the mid-Holocene (Bartlein et al., 2011; Harrison, 2017; Prentice et al., 2011), reconstructions focus in general on a location or a region when considering the whole Holocene. For example regional syntheses for long term paleo records over Europe reveal long term vegetation changes that can be attributed to changes in temperature or precipitation induced by insolation changes (Davis et al., 2003; Mauri et al., 2015). Similarly, over West Africa or Arabia, pollen data suggests a southward retreat of the intertropical convergence zone (Lezine et al., 2017), and a reduction Africa monsoon intensity (Hély and Lézine, 2014). The pace of these

37 changes varies from one region to the other (e.g. Fig. 6.9 in Jansen et al., 2007) (Renssen et al., 2012) and has  
38 been punctuated by millennium scale variability or abrupt events (deMenocal et al., 2000), for which it is still  
39 unclear that they represent global or more regional events. How vegetation changes have been triggered by this  
40 long term climate change and what has been the vegetation feedback on climate is still a matter of debate.

41 Pioneer simulations with asynchronous climate-vegetation coupling suggested that vegetation had a  
42 strong role in amplifying the African monsoon (Braconnot et al., 1999; Claussen and Gayler, 1997; de Noblet-  
43 Ducoudre et al., 2000; Texier et al., 1997). When dynamical vegetation model were included in fully coupled  
44 ocean-atmosphere-sea-ice models, climate simulations suggested a lower magnitude of the vegetation feedback  
45 (Braconnot et al., 2007a; Braconnot et al., 2007b; Claussen, 2009). Individual model results suggest however  
46 that vegetation plays a role in triggering the African monsoon during mid-Holocene (Braconnot and Kageyama,  
47 2015), but also that soil moisture might play a larger role than anticipated (Levis et al., 2004). Dust has also been  
48 identified as an important player with dust emission tied to vegetation cover and slow evolution of soil properties  
49 (Albani et al., 2015; Egerer et al., 2017; Pausata et al., 2016). In high latitude also the role of the vegetation  
50 feedback is not fully understood. Previous studies showed that the response of vegetation in spring combined to  
51 the response of the ocean in autumn were key factors to transform the seasonally varying insolation forcing into  
52 an annual warming (Wohlfahrt et al., 2004). The magnitude of this feedback has been questioned by Otto et al.  
53 (Otto et al., 2009), showing that vegetation was mainly responding to ocean and sea-ice induced warming over  
54 land. The role and magnitude of the vegetation feedback was also questioned over Asia (Dallmeyer et al., 2010).  
55 The variety of response of dynamical vegetation models to external forcing is also an issue in these discussions,  
56 even though the fact that they all produce increased vegetation in Sahel when forced with mid-Holocene suggest  
57 that despite the large uncertainties robust basic response can be inferred from current models (Hopcroft et al.,  
58 2017). Other studies have also highlighted that there might exist several possible vegetation distribution at the  
59 regional scale for a given climate that can be related to instable vegetation states (e.g. Claussen, 2009). This is  
60 still part of the important questions to solve to fully explain the end of the African humid period around 4000-  
61 5000 years BP (Liu et al., 2007).

62 It is not clear yet that more comprehensive models and long Holocene simulations can help solve all the  
63 questions, given all the uncertainties described above. But they can help solve the question of vegetation-climate  
64 state and of the linkages between insolation, trace gas forcing, climate and vegetation changes contrasting the  
65 evolution between polar, temperate and tropical regions. For this, we investigate the long term trend and  
66 variability of vegetation characteristics as simulated by a version of the IPSL model with a fully interactive  
67 carbon cycle and dynamical vegetation, considering the last 6000 years. Previous studies clearly highlight that  
68 small differences in the albedo or soil formulation can have large impact on the simulated results (Bonfils et al.,  
69 2001; Otto et al., 2011). Given all the interactions in a climate system, the climatology produced by a model  
70 version with interactive vegetation is by construction different from the one of the same model with prescribed  
71 vegetation. In particular model biases are in general larger (Braconnot and Kageyama, 2015; Braconnot et al.,  
72 2007b), so that the corresponding simulations need to be considered as resulting from different models  
73 (Kageyama et al., 2018). In this study, we started from the IPSLCM5A-MR version of the IPSL model (Dufresne  
74 et al., 2013) and implemented an intermediate version of the land-surface model ORCHIDEE between the one  
75 used in IPSLCM5A-MR and the one now included in the IPSLCM6A-LR version of the model. Small tuning  
76 and changes in the way we consider the aerosol forcing in the simulation also affects the results of the simulated

77 mid-Holocene climate, and thereby the transient Holocene simulation with dynamical vegetation. Because of  
78 this, the initial mid-Holocene (6ka BP or MH in the following) starting point with this model cannot be directly  
79 compared to the mid-Holocene simulations ran as part of PMIP3-CMIP5 (Kageyama et al., 2013a). It is  
80 important to know how these changes affect model results and the realisms we can expect from the transient  
81 simulations. We thus investigate first how the different changes we made affect mid-Holocene simulations.  
82 Different strategies can be used to initialize the vegetation dynamics and produce the mid-Holocene initial state  
83 for the transient simulation. We investigate if they have an impact on the simulated vegetation states and if the  
84 transient simulation produces climate and vegetation states compatible with what is obtained from snap shot  
85 experiments. For the transient experiments, the focus will be on the long term trends in climate and vegetation so  
86 as to isolate the direct response to insolation and trace gases forcing. Key questions concern the differences  
87 between hemispheric variations and regional characteristics, considering the timing or the magnitude of the  
88 response to forcings compared to the magnitude of centennial internal variability.

89 The remainder of the manuscript is organized as follow. The first part describes the model version and  
90 the characteristics of the land surface model we have implemented to account for the dynamical vegetation.  
91 Section 2 discusses possible differences in model initial state depending on the modelling and experimental  
92 choices we made. Section 3 analyses mid Holocene snapshot simulations and the impact of model physics, and  
93 discusses the choice of an initial state for the transient simulation. Section 4 presents the transient simulation  
94 focusing on long term climate and vegetation trends at global and regional scales, before the conclusion in  
95 section 5.

## 96 **2 Model, mid Holocene and preindustrial experiments**

### 97 **2.1 The IPSL Earth System Model**

98 We use a modified version of the IPSL model compared to the one used for CMIP5 simulations  
99 (Dufresne et al., 2013). It has the same resolution and the same atmosphere, ocean and sea-ice physics than the  
100 IPSLCM5A-MR model. This model version thus couples the LMDZ.4 atmospheric model with 144x142 grid  
101 points in latitude and longitude ( $2.5^{\circ} \times 1.27^{\circ}$ ) and 39 vertical levels (Hourdin et al., 2013) to the ORCA2 ocean  
102 model at  $2^{\circ}$  resolution (Madec, 2008). The ocean grid is such that resolution is enhanced around the equator and  
103 in the Arctic due to the grid stretching and pole shifting. The LIM2 sea-ice model is embedded in the ocean  
104 model to represent sea ice dynamics and thermodynamics (Fichefet and Maqueda, 1999). The ocean  
105 biogeochemical model PISCES is also coupled to the ocean physics and dynamics to represent the marine  
106 biochemistry and the carbon cycle (Aumont and Bopp, 2006). The atmosphere-surface turbulent fluxes are  
107 computed taking into account fractional land-sea area in each atmospheric model grid box. The sea fraction in  
108 each atmospheric grid box is imposed by the projection of the land-sea mask of the ocean model on the  
109 atmospheric grid, allowing for a perfect conservation of energy (Marti et al., 2010). Ocean-sea-ice and  
110 atmosphere are coupled once a day through the OASIS coupler (Valcke, 2006). The land surface scheme is the  
111 ORCHIDEE model (Krinner et al., 2005). It is coupled to the atmosphere at each atmospheric model 30mn  
112 physical time steps and includes a river runoff scheme to route runoff to the river mouths or to coastal areas  
113 (d'Orgeval et al., 2008). Over the ice sheet water is also routed to the ocean and distributed over wide areas so as  
114 to mimic iceberg melting and to close the water budget (Marti et al., 2010). This model accounts for a mosaic

115 vegetation representation in each grid box, considering 13 (including 2 crops) plant functional types (PFT) and  
116 fully interactive carbon cycle (Krinner et al., 2005).

117 Compared to the standard version of the IPSLCM5A model described above, several changes were  
118 included in the land-surface model. The first one concerns the inclusion of the 11 layers physically-based  
119 hydrological scheme (de Rosnay et al., 2002) that replaces the 2 layers bucket-type hydrology (Ducoudré et al.,  
120 1993). Several model adjustments had to be done to set up the model version with the 11 layer hydrology  
121 (simulation L11, Table 1). The land surface components were available, but had never been fully tested in the  
122 full coupled mode before this study. We gave specific care to the closure of the water budget of the land surface  
123 model to ensure that  $O(1000)$  years simulations will not exhibit spurious drift in sea level. In addition the new  
124 prognostic snow model was included (Wang et al., 2013). The scheme describes snow with 3 layers that are  
125 distributed so that the diurnal cycle and the interaction between snowmelt and runoff are properly represented. In  
126 order to avoid snow accumulation on some grid points, snow depth is not allowed to exceed 3m. The excess  
127 snow is melted and included in soil and runoff while conserving water and energy (Charbit and Dumas, pers.  
128 communication). Because of a large cold bias in high latitudes in the first tests, we also reduced the bare soil  
129 albedo that is used to combine fresh snow and vegetation in the snow aging parameterization.

130 The version of the model used for the transient late Holocene simulation also accounts for the changes  
131 in vegetation in response to climate and  $\text{CO}_2$  evolution. Off line simulations, using the original scheme for  
132 dynamical vegetation of ORCHIDEE, were already used to analyze Mid-Holocene and LGM vegetation forced  
133 with climate simulated by the IPSLCM5A-LR model (Kageyama et al., 2013b; Woillez et al., 2011). Here we  
134 switch on the dynamical vegetation model described in Zhu et al. (2015). Compared to the original scheme  
135 (Krinner et al., 2005), this version of the land surface model produces more realistic vegetation distribution in  
136 mid and high latitude regions when compared with present-day observations. We conducted several tests to  
137 initialize the vegetation distribution for this first long mid to late Holocene transient simulation as discuss in  
138 section 3.

## 139 **2.2 Mid Holocene experimental design**

140 The mid-Holocene (MH) time-slice climate experiment (6000 years BP) represents the initial state for  
141 the transient late Holocene simulation with dynamical vegetation. It is thus considered as a reference climate in  
142 this study. Because of this, and to save computing time, all model adjustments made to set up the model content  
143 and the model configuration were mainly done using mid-Holocene simulations and not pre-industrial  
144 simulations. Only a subset of tests is available for the pre-industrial period as shown in Table 1 and 2.

145 The MH simulations have been performed with Earth's orbit and trace gazes prescribed to the 6kyr BP  
146 conditions. Compared to previous PMIP3 6kyr BP simulations with the IPSL model (Kageyama et al. 2013) we  
147 decided to only consider natural aerosols. In the IPSL model, aerosols are accounted for by prescribing the  
148 optical distribution of dust, sea-salt, sulfate and particulate organic matter (POM), so as to take into account the  
149 aerosol forcing in the radiative code (Dufresne et al., 2013). In PMIP3 simulations these variables were  
150 prescribed to 1860 CE values, which correspond to the beginning of the industrial area for which the level of  
151 sulfate and POM is slightly higher than the values found in the Holocene (Kageyama et al., 2013a). Here we  
152 prescribe only dust and sea-salt and neglect the other aerosols. This choice was driven by the fact that we also  
153 plan to run simulations with fully interactive dust and sea-salt.

154 Most of the tests done to set up the model version follow the PMIP3 protocol (Braconnot et al., 2012).  
155 But the transient simulation, and thus the long mid Holocene simulations used as initial state for it, both follow  
156 the PMIP4-CMIP6 protocol (Otto-Bliesner et al., 2017, Tab. 1). For PMIP4-CMIP6 simulations, the latest  
157 estimate of trace gases ( $\text{CO}_2$ ,  $\text{CH}_4$  and  $\text{N}_2\text{O}$ ) from ice cores are imposed as boundary conditions, to have a  
158 consistent history of the evolution of these gases across the Holocene (Otto-Bliesner et al., 2017). We run a 1000  
159 year-long simulation to produce 6ka BP initial conditions in equilibrium with the external forcing (insolation,  
160 trace gases and aerosols) that can be used as initial state for the transient late Holocene simulations. The version  
161 with interactive vegetation needs also to be integrated long enough to build the vegetation cover in equilibrium  
162 with the mid-Holocene climate (see section 3).

### 163 **2.3 Impact of model version and forcing strategy on mid-Holocene climate**

164 Figures 1a and b compare the results of a MH simulation using the new hydrology and snow model  
165 when forced with PMIP4 boundary conditions to the PMIP3-CMIP5 MH simulation (MH-FPMIP4) with the  
166 standard IPSLCM5A-LR version of the IPSL model (MH-PMIP3). The simulated MH climate is globally  
167 warmer in MH-FPMIP4, except over tropical forests in Africa and Amazonia, and in East Asia and Siberia (Fig.  
168 1b). It is associated with larger precipitations in the tropics and in mid latitudes, and with reduced precipitation  
169 in the subtropics (Fig. 1a). These differences in MH climatology between the two simulations result from both  
170 the changes in the configuration of the land surface model and the changes in forcing. Table 1 presents the major  
171 simulations done to test some of the last model improvements and tuning that affect the global energy and  
172 hydrological cycles. They all keep exactly the same set of adjusted parameters as in Dufresne et al. (2013) for the  
173 ocean-atmosphere system. The additional adjustments only concerned the land surface model and the forcing  
174 factors.

175 All the simulations were run long enough (300-1000 years) to reach a radiative equilibrium and be  
176 representative of stabilized MH climate (Fig. 2). They are free of any artificial long term trends after the  
177 adjustment phase and the global averages of the surface flux and the radiative budget at top of the atmosphere  
178 close are close to zero (i.e.  $0.4 \text{ W.m}^{-2}$ ). This closure of the surface fluxes is equivalent to the one in previous  
179 IPSL PMIP3 MH simulation (Kageyama et al., 2013a). Figure 2 also highlights that the new hydrological model  
180 (L11) produces about  $1.25 \text{ mm.d}^{-1}$  higher global annual mean evaporative rates than MH PMIP3, but that this  
181 higher evaporation is achieved with similar global mean temperature. The water cycle is more active in L11. It  
182 has implications on the geographical distribution of precipitation and temperature compared to the MH PMIP3  
183 simulations (Fig. 1c). With the new hydrology, precipitation is enhanced in the mid-latitudes and over the  
184 tropical lands where larger evapotranspiration and cloud cover both contribute to cool the land surface (Fig. 1d).  
185 Part of the land surface cooling as due to a high fresh snow albedo in this first L11 version of the land surface  
186 model. In the tropical region, the Amazon basin is more humid, as is the Indian monsoon. West Africa is slightly  
187 less humid, whereas precipitation is increased in equatorial Africa and over the Gulf of Guinea (Fig. 1c).  
188 Similarly, precipitation is increased in the western part of the Indian Ocean and decreased over the maritime  
189 continent and along the equator in the Pacific Ocean (Fig. 1c). Interestingly, the cooling over land is  
190 compensated at the global scale by a warmer surface ocean (Fig. 1d).

191 The changes in the way aerosols are considered in the transient simulations have an impact on the  
192 global model adjustment. Only considering dust and sea salts lead to a radiative difference of about  $2.5 \text{ W.m}^{-2}$  in

193 external climate forcing compared to previous simulations, as seen by the heat budget imbalance at the surface at  
194 the beginning of the L11Aer simulation (Figure 2). When it is implemented in the coupled model simulations  
195 this additional forcing leads to excess energy at the surface and an increase of the 2m air temperature. The global  
196 scale adjustment of the model is achieved in approximately 250 years when the surface heat budget becomes  
197 close to 0 (Fig. 2a), but global air temperature has increased by 1.5 °C. The largest warming over land is found in  
198 the northern hemisphere, but the ocean warms almost everywhere, except in the Antarctic circumpolar current,  
199 by about 1°C (Fig. 1f). In the southern hemisphere the subduction of surface waters and insulator effect of sea-  
200 ice explain that the surface remains cooler than in the other regions (Fig. 2f). These warmer conditions favors  
201 higher precipitation over the tropical ocean and in mid-latitude with a global pattern rather similar to what is  
202 expected in simulation of global warming induced by increased atmospheric CO<sub>2</sub> (Fig. 2e). Note that a similar  
203 offset in external forcing is also present in the pre-industrial simulation in this case. The effect on the differences  
204 between mid-Holocene and pre-industrial climate might be small compared to the effect on mean climatology for  
205 a given period.

206 In figure 1 the larger precipitation in L11 compared to PMIP3 can be partially explained by larger  
207 evaporation resulting from higher evaporation rate of bare soil, which appeared to be too high in intermediate  
208 seasons. The model bare soil evaporation is exacerbated by the fact that the way the mosaic vegetation is  
209 constructed favors too much bare soil when leaf area index (LAI) is low (Guimberteau et al., 2018). To  
210 overcome this problem, an artificial 0.70 factor was implemented to limit bare soil evaporation (Table. 1). All  
211 the other surface type remains as they are in L11. This factor is compatible with the order of magnitude of the  
212 reduction brought by the implementation of a new evaporation parametrization for bare soil in later IPSLCM6A  
213 version of the model (Peylin et al. pers. com.). The second one concerns the combination of snow albedo with  
214 the vegetation albedo. The procedure was different when vegetation was interactive or prescribed. In both cases  
215 the albedo results now from a combination of snow and vegetation albedo based on the effective vegetation  
216 cover in the grid box, which put a substantial weight on bare soil albedo when LAI is small. The albedo becomes  
217 thus larger in simulations in which the vegetation is prescribed compared to the IPSL-CM5A-LR reference  
218 version of the model. It counteracts the effect of the fresh snow albedo reduction.

219 Since we are dealing with a coupled system, some of these changes didn't lead to the direct expected  
220 changes on the model climatology due to internal feedbacks in the coupled system. In particular, the reduction of  
221 bare soil evaporation didn't reduced evaporation as expected. This is due to the temperature feedback in the  
222 coupled system. Indeed, when evaporation is reduced, soil temperature increases and the regional climate get  
223 warmer allowing for more moisture in the atmosphere and thereby more evaporation where soil can supply water  
224 (Figure 1 g and h and Fig. 2). Therefore, the difference does not show up on the precipitation map (Fig. 1g) but  
225 on the increased temperature over land in the northern hemisphere (Fig. 1h). It is consistent with similar findings  
226 when analyzing land use feedback (Boisier et al., 2012). In our case, it partly counteracts a model cold bias in  
227 these regions. This unexpected results with a forced vegetation model reasoning stresses once that fast feedbacks  
228 occur in coupled systems and that any comparison of surface fluxes should consider both the flux itself and the  
229 climate or atmospheric variables used to compute it (Torres et al., 2018). Note that in figure 1h the small global  
230 warming is still a footprint of the warming induced by the aerosol effect described above.

231 Finally, compared to the 11LAerEV simulation the cooling found for the MH-FPMIP4 simulation  
232 reflects the difference between the PMIP3 and PMIP4 external forcing. The difference in forcing was estimated

233 to  $-0.8 \text{ W.m}^{-2}$  by Otto-Bliesner et al. (2017). This is the order of magnitude found for the imbalance in surface  
234 net surface heat flux at the beginning of the MH-FPMIP4 simulation that started from L11Aer run with PMIP3  
235 protocol (Fig. 2a). As expected, it leads to a slight cooling and corresponding reduction of evaporation and  
236 precipitation.

## 237 **2.4 How good is this version compared to present day climatology?**

238 The way the different changes affect the model climatology is similar for the mid-Holocene and  
239 preindustrial climates. We only run a pre-industrial simulation PI with the version including all changes (PI-  
240 FPMIP4, Tab. 1). This allows us to objectively assess if the introduction of the new hydrology and the  
241 adjustments degrade or improve the model results compared to the IPSLCM5A-LR CMIP5 simulation (PI-  
242 PMIP3, Tab. 1).

243 A rapid overview of model performances is provided by a simple set of metrics derived from the metric  
244 package (Gleckler et al., 2016), where the new version is compared to PI-PMIP3 and to all the other available  
245 CMIP5 PI simulations (Fig. 3). This figure highlights that the annual mean model bias is reduced for  
246 temperature, at about all model levels but enhanced for precipitation and total precipitable water (Fig. 3a). This  
247 echoes the analyses above showing that precipitation is increased in the 11 layer soil hydrology due to larger  
248 evaporation. The evaporation and precipitation biases are reinforced by the warming induced by the offset in  
249 radiative forcing we introduce by only considering dust and sea-salt aerosols. The latter however also contributes  
250 to reduce temperature biases. Despite this precipitation bias that slightly degrades the overall model  
251 performances compared to the CMIP5 ensembles (Fig. 3b) the model performs quite well compared to the other  
252 CMIP5 simulations, except for cloud radiative effect. The effect of cloud in the IPSLCM5A-LR simulations has  
253 already been pointed out in several manuscripts and results mainly from low level clouds over the ocean  
254 (Braconnot and Kageyama, 2015; Vial et al., 2013). Note that the atmospheric tuning is exactly the same as in  
255 the default IPSLCM5A-LR version, and that the changes described above have almost no effect on the cloud  
256 radiative effect. Overall the model version with the 11 layers hydrology has similar skill as the IPSLCM5A  
257 reference (Dufresne et al., 2013) and we are confident that the version is sufficiently realistic to serve as a basis  
258 on top of which we can include the dynamical vegetation.

## 259 **3 Mid-Holocene simulations with interactive vegetation**

### 260 **3.1 Initialization of the mid-Holocene dynamical vegetation and simulated mid Holocene climate**

261 Two different strategies have been tested to initialize the dynamical vegetation (Table 2). In the first one  
262 (Vmap), the vegetation distribution was obtained from an off line simulation with the land surface model that has  
263 been forced by CRU-NECP 1901-19010 climatology (Viovy, 2018) regrided on the IPSLCM5A-MR model  
264 resolution. The resulting map was then prescribed as initial state in the coupled model and the dynamical  
265 vegetation was switched on to run a mid-Holocene simulation (Fig. 4). In the second case (Vnone), the model  
266 restarted from bare soil with the dynamical vegetation switched on, using the same initial state as for the  
267 previous simulation for the atmosphere, the ocean, sea-ice and land-ice. Despite a tendency to converge to  
268 different solutions in the beginning of the simulation (black and blue curves in Fig. 4 a,b, and c), the two  
269 simulations converge with very similar global vegetation cover over a longer time scale after that the PMIP4

270 instead of PMIP3 mid Holocene boundary conditions were applied to the model (red and yellow curves in Fig. 4  
271 a,b, and c). It suggests that there is only one global mean stable state for the mid-Holocene with the IPSL model,  
272 irrespective of the initial vegetation distribution.

273 Compared to the reference vegetation used when vegetation is prescribed to modern values (green line  
274 in Fig. 4 d, e, and f), the bare soil cover is reduced and grasses and trees occupy a larger land fraction (Fig. 4 b  
275 and c). Note however that the global averages mask small differences in regional vegetation cover (Figure 5 a, d,  
276 and g). MH Vmap reproduces slightly more trees in West Africa and less trees north of 60°N than Vnone (Fig.  
277 5g). Over most of these grid points the differences in trees are compensated by grass (Fig. 5d) except to the south  
278 of the Tibetan plateau where bare soil is dominant in Vmap (Fig. 5a).

279 Figures 6a and b indicate that the simulated MH climate with interactive vegetation is warmer than the  
280 simulation with prescribed vegetation over the continents and in the South Atlantic Ocean. It also highlights that  
281 precipitation is increased over the African tropical forest and reduced over South America. Over Eurasia, part of  
282 the warming comes from the fact that there is cropland in the 1860 CE vegetation map when vegetation is  
283 prescribed (Fig. 3). When the dynamical vegetation is active, the resulting map only includes natural vegetation.  
284 In most of Eurasia forest replaces croplands (Fig. 6f). The lower forest albedo induces warmer surface conditions  
285 in these regions. Also when snow combines with forest instead of grasses, the snow/vegetation albedo is lower  
286 leading to the positive snow-forest feedback widely discussed for the last glacial inception (de Noblet et al.,  
287 1996; Kutzbach et al., 1996). The plus minus features over the tropical ocean suggest a slight shift in the location  
288 of the Inter Tropical Convergence Zone (ITCZ) and South Pacific Convergence Zone (SPCZ), whereas over  
289 South America it mainly shows reduced precipitation in the west and a slight increase in the east (Fig. 6a). These  
290 large scale patterns result from large scale changes in atmospheric and ocean circulations induced by differences  
291 in the land-sea contrast and regional changes in vegetation.

### 292 **3.2 Simulated versus reconstructed mid-Holocene vegetation**

293 The vegetation dynamics module simulates fractional cover of each PFT, which cannot be directly  
294 compared with the reconstruct biome types based on pollen and plant macrofossil data from the BIOME 6000  
295 dataset (Harrison, 2017). In order to facilitate the comparison, we use a biomization method to convert modeled  
296 vegetation properties into the eight “megabiomes” provided by BIOME 6000 (Fig. 7). The algorithm, uses a  
297 mixture of simulated climate and vegetation characteristics (see Fig. A2.). The default values for each threshold  
298 are the same as in Zhu et al. (2018). Several sensitivity tests with alternative thresholds proposed in previous  
299 studies (Joos et al., 2004; Prentice et al., 2011) have been done to account for the uncertainties in the biomization  
300 methodology (see Fig. A2). They provide similar results as the one provided for PI-VNone in figure 7. It also  
301 shows that, as expected from figure 5, Vnone and Vmap produce very similar results.

302 At first look PI-Vnone reproduces the large scale pattern found in the BIOME6000 (Fig. 7a). The  
303 comparison however indicates that the boreal forest tree line is located too far south, which suggests a cold bias  
304 in temperature in these regions. Also vegetation is underestimated in West Africa, consistent with a dry bias (not  
305 shown). The underestimation of the African monsoon precipitation is present in several simulations with the  
306 IPSL model (Braconnot and Kageyama, 2015), and is slightly enhanced in summer when the dynamical  
307 vegetation is active. With interactive vegetation however equatorial Africa is more humid (Fig. 6a).



308 Figure 7c provides an idea of the major mismatches between simulated vegetation and the  
309 reconstructions. A perfect match with the biome reconstruction would only produce values on the diagonal. The  
310 overall percent of correctness at the reconstruction sites is about 50%. In particular the simulation produces too  
311 much desert where we should find grass and shrub. It also produces too much tundra instead of boreal forest, and  
312 too much Savanah and dry woodland in several places that should be covered by temperate-tree, boreal-tree or  
313 tundra, confirming the visual map comparison (Fig. 7c).

### 314 **3.3 Comparison with the pre-industrial climate**

315 We also tested the results of the dynamical vegetation in simulations of the preindustrial climate (dark  
316 pink and orange lines in Fig. 4d, e and f), to check if PI vegetation and climate would also be similar when  
317 starting from MH-Vmap or MH-Vnone. This is also a way to have a better idea of the range of response one  
318 would expect from ensemble simulations, knowing that we will only run one full transient simulation with  
319 interactive vegetation. Simulated climate and vegetation biases also impact the representation of the vegetation  
320 cover when vegetation is fully interactive in the model. They also need to be accounted for to assess the response  
321 of vegetation to insolation forcing.

322 For the PI-Vmap simulation, the orbital parameters and trace gases were first prescribed to pre-  
323 industrial conditions for 15 years while the vegetation map allocating the different PFTs in each grid cell was  
324 prescribed to the vegetation map obtained in MH-Vmap (Tab. 2, Fig. 4). Then, the dynamical vegetation was  
325 switched on. Since surface variables adjust rapidly, this is a way to compare the rapid adjustment to insolation  
326 and the additional effect due to the dynamical vegetation (not discussed here). The switch to dynamical  
327 vegetation induces a rapid transition of the major PFTs that takes about 10 years before a new global equilibrium  
328 is reached (Fig. 4 d, e and f). For PI-VNone the same procedure was applied, but the dynamical vegetation was  
329 switched on after 5 years (Tab. 2 and Fig. 4). For this simulation, vegetation converges rapidly to the new  
330 equilibrium state, without any relaxation or rapid transition.

331 PI-Vnone and PI-Vmap converge to different global vegetation states (Fig. 4). In particular PI-Vmap  
332 produces a larger bare soil cover than PI-Vnone (Fig. 4 d). It is even larger than the total bare soil cover found in  
333 the 1860 CE map used in PI simulations when vegetation is prescribed (Fig. 4). Interestingly part of these  
334 differences between Vmap and Vnone, are found in the southern hemisphere and the northern edge of the  
335 African and Indian monsoon regions (Fig. 5b). The differences in the tree cover in the northern hemisphere is  
336 also slightly enhanced compared to the one found between these two simulations for the corresponding MH  
337 simulations (Fig. 5). These differences in PI vegetation explain the vegetation differences between MH and PI  
338 (Fig. 8). The simulated changes seem larger with Vmap. Previous assessment of model results against vegetation  
339 and paleoclimate reconstructions (e.g. Harrison et al., 2014; Harrison et al., 1998) suggest that MH – PI  
340 vegetation for Vmap would look in better agreement with reconstructed changes from observations in terms of  
341 forest expansion in the northern hemisphere or grasses in Sahel (Fig. 7 c, d, e and f). However the modern  
342 vegetation map for this PI-Vmap simulation has even less forest than PI-Vnone north of 55°N (Fig. 4 e, f and i),  
343 for which forest is already underestimated (not shown). These differences in PI vegetation have only a small  
344 counterpart in climate. It corresponds to cooler condition in the mid and high northern latitude (Fig. 6f). In annual  
345 mean there is almost no impact on precipitation (Fig. 6e).

346 Compared to the version with the 11 layer hydrology (PI-FPMIP4) both PI-Vmap and PI-Vnone have  
347 larger temperature biases, mainly because of the Northern (NH ) hemisphere warming induced by vegetation  
348 (Fig. 6b). It brings the global performances for temperature close to the IPSLCM5A-LR CMIP5 version. It also  
349 contributes to reduce the mean bias in precipitable water, evaporation, precipitation and long wave radiation. It  
350 has no effect however on the bias pattern (assessed by the rmst in Fig. 4). Figure A1 (see annex) further shows  
351 that the performances of PI-Vnone and PI-Vmap are very similar, and closer to each other than to other  
352 simulations, whatever the season or the latitudinal band. The small differences in climate listed above are thus  
353 too small to be captured by global metrics. It suggests that there is not direct relationship between the different  
354 vegetation maps and model performances. The different vegetation maps are obtained with a similar climate,  
355 which indicates that in this model multiple global and vegetation states are possible under pre-industrial climate  
356 or that tiny climate differences can lead to different vegetation cover in the northern hemisphere. Results for the  
357 southern hemisphere are more puzzling.

## 358 **4 Simulated climate and vegetation throughout the mid to late Holocene**

### 359 **4.1 Initial state and experimental design for the transient simulations.**

360 Previous section indicates that there are very little differences in terms of climate between PI-Vnone  
361 and PI-Vmap, but that the simulated vegetation for the PI climate is substantially different. In particular PI-  
362 Vnone produces less bare soil and more forest in mid and high northern latitudes (Fig. 5). The major drawback is  
363 that West Africa is slightly less satisfactorily represented in PI-Vnone simulation. Despite this bias, we decided  
364 from a global perspective to use a 1<sup>st</sup> of January obtained after 500 year in MH-Vnone-FPMIP4 as initial state  
365 for the transient TRHOLV simulation (Tab. 2).

366 For this simulation the trace gazes vary every year using one of the latest reconstructions for CO<sub>2</sub>, CH<sub>4</sub>  
367 and N<sub>2</sub>O, that has been provided by Joos (see Otto-Bliesner et al., 2017). The atmospheric CO<sub>2</sub> concentration is  
368 slowly rising throughout the Holocene from 264 ppm 6000 years ago to 280 for the pre-industrial climate around  
369 -100 PB (1850 CE) and then experiences a rapid increase from -100 BP to 0 BP (1950 CE) (Fig. 9). The methane  
370 curve shows a slight decrease and then follows the same evolution as CO<sub>2</sub>, whereas NO<sub>2</sub> is almost flat  
371 throughout the period. The impact of the small variations in atmospheric trace gazes is small over most of the  
372 Holocene (Joos and Spahni, 2008). The largest changes in these trace gazes occurred with the industrial  
373 revolution, so that they have an imprint of about 1.28 W.m<sup>-2</sup> additional forcing in the atmosphere compared to  
374 MH, most of which occurs in the last 100 years.

375 The major forcing comes from the slow variations of the Earth's orbital parameters. The change in  
376 seasonality is the dominant factor that affects climate variations over most of the Holocene, except in the last  
377 part of the simulations from 2000 years BP onward (Fig. 10). The changes in seasonality correspond to decrease  
378 seasonality in the northern Hemisphere and increased seasonality in the southern Hemisphere. Note however that  
379 the timing of the changes for the different seasons (Winter, NDJF, i.e. November to February average, and  
380 Summer, JJA, June to September average) is slightly different between the hemispheres, which modulates the  
381 interhemispheric contrast with time.

## 382 4.2 Long term climatic and vegetation trends

383 Changes in temperature and precipitation follow the long term insolation changes in each hemisphere  
384 and for the different seasons until about 2000 yrs BP to 1500 yrs BP (Fig. 10). Then trace gazes and insolation  
385 forcing become equivalent in magnitude and small compared to MH insolation, until the last period where trace  
386 gazes lead to a rapid warming in both hemispheres. The NH summer cooling reaches about 0.8 °C and is  
387 achieved in 4000 years. The last 100 year warming reaches 0.6 °C and almost counteracts, for this hemisphere  
388 and season, the insolation cooling. SH summer and NH Winter conditions (NDJF) are both characterized by a  
389 first 2000 years warming induced by insolation. It reaches about 0.4°C. It is followed by a plateau of about 3000  
390 years before the last rapid increase of about 0.6°C that reinforces the effect of the Holocene insolation forcing.  
391 During SH winter temperature does not seem to be driven by the insolation forcing (Fig. 10 d). In this  
392 hemisphere part of the insolation forcing is absorbed in the ocean (not shown), which dampens the surface  
393 temperature warming. In both hemispheres precipitation trends are well correlated to temperature trends, as it is  
394 expected from a hemispheric first order response driven by Clausius Clapeyron relationship (Held and Soden,  
395 2006). This is not the case for winter conditions because one needs to take into account the changes in the large  
396 scale circulation that redistribute heat and energy between regions and hemispheres (Braconnot et al., 1997;  
397 Saint-Lu et al., 2016).

398 Interestingly temperature and precipitation exhibit centennial variability that is not present in the  
399 imposed insolation and trace gazes forcing. It is the results of all the internal interactions between the physical  
400 climate, carbon and dynamical vegetation. Because of this it is difficult for example to say if the NH hemisphere  
401 winter temperature trend was rapid until 4000 years BP and then temperature remains stable, or if the event  
402 impacting temperature and precipitation around 4800 to 4500 BP masks a more gradual increase until 3000 BP  
403 as it is the case for NH Summer where the magnitude of the temperature trend is larger than variability (Fig. 10  
404 b). Note that some of these internal fluctuations reach half of the total amplitude of the trend, even with the 100  
405 year smoothing applied before plotting. Temperature and precipitation are well correlated at this centennial time  
406 scale and hemispheric scales for all seasons.

407 The associated vegetation trends correspond to reductions or increases reaching 2 to 4% of total land  
408 areas depending on vegetation type. It is consistent with the order of magnitude found in figure 4 between the  
409 MH and PI simulations (Fig. 11). It follows the insolation forcing trend in both hemispheres. It is thus opposite  
410 in the two hemisphere, except for the last part where the recent period reflects the rapid increase of atmospheric  
411 CO<sub>2</sub> concentration. In addition this long term evolution parallels the evolution of temperature and precipitation,  
412 with a good correlation with summer conditions (Fig. 10). As expected, the global vegetation averages reflect the  
413 northern hemisphere changes where most of the vegetated continental masses are located. The largest trends are  
414 found for tree and grass covers in both hemispheres, with the exception of the last 100 year period where bare  
415 soil variation are relatively larger than for the whole mid to late Holocene. The gross primary productivity (GPP,  
416 Fig. 11 d) is driven in both hemispheres by the changes in tree cover. It accounts for a reduction of about 5  
417 PgCy<sup>-1</sup>. The GPP increase in the last 100 years results from increased atmospheric CO<sub>2</sub>. It is however possible  
418 that the GPP change is underestimated in this simulation because CO<sub>2</sub> is prescribed in the atmosphere, which  
419 implies that the carbon cycle is not fully interactive.

### 420 4.3 Regional trends

421 Figure 12 highlights relative differences for three regions that respectively represent climate conditions  
422 north of 60°N, over the Eurasian continent, and in the West African monsoon Sahel/Sahara region. These are  
423 regions for which there are large differences in MH – PI climate and vegetation cover (Fig. 6 and 8). They have  
424 also been chosen because they are widely discussed in the literature and are also considered as tipping points for  
425 future climate change (Lenton et al., 2008). A complete evaluation of the simulated trends and timing of the  
426 changes is out of the scope of this paper. However, these regions are well suited to provide an idea of different  
427 characteristics between regions.

428 North of 60°N and in Eurasia a substantial reduction of tree at the expense of grass starts at 5000 years  
429 BP (Fig. 11). Vegetation has almost its pre-industrial conditions around 2500 years BP. Interestingly the largest  
430 trends are found between 5000 years BP and 2500 years BP in this region and this reflects well the timing of the  
431 NH hemispheres summer cooling. The change in total forest in Eurasia is small. A first step change is followed  
432 by a second one around 3000 years BP. The NH decrease in forest cover is mainly driven by the changes that  
433 occur north of 60° N (Fig. 11, 12 and 14 g). Despite the vegetation biases in high latitudes discussed in section 3,  
434 these trends reflects more or less what is expected from observations (Bigelow et al., 2003; Jansen et al., 2007;  
435 Wanner et al., 2008). Even though the curves are smoothed by a 100 years average, they exhibit substantial  
436 centennial variability north of 60°N and in Eurasia (Fig. 12 a and b). The magnitude of this variability represents  
437 up to half of the total signal north of 60°N and up to the maximum change in Eurasia. Over West Africa (Fig. 12  
438 c), and the largest trends starts slightly later (4500-5000 years BP) and are more gradual until 500 years BP. The  
439 vegetation trends are also punctuated by several centennial events that do not alter much the long term evolution  
440 as some of these events do in the other two boxes. The reduction in forest for grasses north of 60°N and increase  
441 in bare soil at the expense of grasses in West Africa lead to reduced GPP (Fig. 13), except for the last part in  
442 high latitudes when tree cover regrows when CO<sub>2</sub> increases. This effect is consistent with the observed historical  
443 growth in gross primary production discussed by Campbell et al. (2017).

444  
445 Figure 12 provides the feeling that there are only marginal changes in Eurasia in terms of vegetation. It  
446 is partially due to the fact that the total tree cover does not reflect well the mosaic vegetation and forest  
447 composition. Figure 15 shows the relative change of the different types of forest found over Eurasia. It shows  
448 that the long term decrease in forest is dominated by the decrease in temperate and boreal deciduous trees.  
449 Boreal needleleaf evergreen trees do not change whereas the temperate ones increase. The different trees have  
450 also different timing and variability. This figure highlights that the long term change in Eurasian tree  
451 composition throughout the mid to late Holocene is also punctuated by centennial variability. The large events  
452 have a climatic counterpart (Fig. 10), so that the composition of the vegetation is certainly the results of a  
453 responses to the long term climatic change and to variability that can lead to different vegetation composition  
454 depending on stable or unstable vegetation states (Scheffer et al., 2012). Rapid changes and variability has been  
455 discussed for recent climate in these regions (Abis and Brovkin, 2017), which suggests that despite the fact that  
456 our dynamical vegetation model might underestimate vegetation resilience the rapid changes in vegetation  
457 mosaic induced by long term climatic trend and variability in this transient simulation deserve attention.

#### 458 **4.4 The PI and historical period in the transient simulation**

459 Sever studies suggest that the initial state has only minor impact on the final climate because there is  
460 almost no changes in the thermohaline circulation over this period and models do not exhibit major climate  
461 bifurcations (e.g. Bathiany et al., 2012). This is the main argument used by Singarayer et al. (2010) to justify that  
462 their suite of snap shot experiments may provide reasonable transient climate vision when put together. It is the  
463 case in the TRHOLV simulation when vegetation is fully interactive? This transient simulation does not exhibit  
464 much change in indices of thermohaline circulation that remains close to 16-18 Sv ( $1 \text{ Sv} = 10^6 \text{m}^3 \cdot \text{s}^{-1}$ ) throughout  
465 the period. The preindustrial climate (1860 CE) corresponds to the climate around 100 BP in the TRHOLV  
466 simulation (Fig. 10). The global metrics (Fig. 3) show that at the global scales the results of the TRHOLV  
467 simulations are similar to those of PI-Vnone. It is also the case for seasonal and extratropical/tropical values (Fig.  
468 A1). We can therefore conclude that there is no difference in mean surface climate characteristics between the  
469 snap shot PI-Vnone experiments and the PI period simulated in transient TRHOLV simulation.

470 Then, is the vegetation also similar to the one simulated in PI-VNone? The MH minus PI differences  
471 and the PI vegetation and simulated in TRHOLV (Fig. 14 a, d, and g, and c, f, and i) shows little differences to  
472 the one found for PI-Vnone (Fig. 8 b, d, and f, and Fig. 14 b,e,and h). The relative percentages of land covered  
473 by the different vegetation classes correspond to 15% for bare soil, 41% for grass and 43% for tree respectively.  
474 These values are similar to the one found for PI-VNone (15%, 40% and 44% respectively) within 1% error bar.  
475 They are both different from those of PI-Vmap (20%, 37% and 43%). It suggests that the adjustment time is long  
476 enough to converge to similar solutions. It thereby questions why we found different PI climate-vegetation state  
477 between PI-Vmap and PI-Vnone. This doesn't necessarily hold at the regional scale where regional differences  
478 are also found between PI-THROLV and PI-Vnone. Indeed, Figure 15 b, e, and h indicate differences in tree and  
479 grass cover in Eurasia around 60°N and different geographical coverage between bare soil, grass and trees over  
480 South Africa and Australia. Further investigation would be needed to fully assess these differences and analyze  
481 the possible role of variability in these differences.

482 The last point to mention is the fact that the effect of trace gases and in particular of the rapid increase  
483 of the atmospheric CO<sub>2</sub> concentration over the last part of the simulation has also a strong impact on the  
484 evolution of the natural vegetation. When reaching 0k BP (1950 CE), bare soil remains close to PI, grass reduces  
485 by 3% and tree increases by about 3%. Interestingly this tree recovery counteracts the reduction from mid  
486 Holocene in mid and high NH latitudes (Fig. 15 f). Bare soil is only slightly higher and grass smaller. It is not  
487 possible here to properly assess the historical climate and vegetation cover of THROLV. In the real world, they  
488 have been both affected by land-use that is neglected here. Nevertheless, our results raises once more that for  
489 model data comparison, the reference period is of great importance to be able to fully assess model results. They  
490 also remind us that the historical period is unusual in the context of the mid to late Holocene.

#### 491 **5 Conclusion**

492 This long transient simulation over the last 6000 years with the IPSL climate model is still one of the  
493 first simulations over this period with a general circulation model to include a full interactive carbon cycle and  
494 dynamical vegetation. We show that, despite some model biases that are amplified by the additional degree of  
495 freedom resulting from the coupling between vegetation and climate, the model reproduce reasonably well the

496 large scale feature expected from the observation over this period. There has been lots of discussion on the sign  
497 of the trends in the northern mid-latitude following the results of the first coupled ocean-atmosphere simulation  
498 with the CCSM3 model across the deglaciation. Our results seem in broad agreement with the 6000 to 0 part of  
499 the revised estimates by Marsicek et al. (Marsicek et al., 2018). There is little change in annual mean throughout  
500 the last 6000 years (not shown). The seasonal cycle is the main driver of the climate and vegetation changes.

501 Several points emerge from this study. The first one is that the long term evolution of vegetation cannot  
502 be characterized by a linear trend from the mid-Holocene to the preindustrial climate. The major changes occur  
503 between 5000 and 2000 year BP and the exact timing depends on regions. In our simulation the forest reduction  
504 in the northern hemisphere starts earlier than the vegetation changes in Africa. It also ends earlier. The last  
505 period, starting about 2000 years ago reflects the increase in trace gases with a rapid regrowth of tree in the last  
506 100 years when CO<sub>2</sub> and temperature increase at a rate not seen over the last 6000 to 2000 years. Some of these  
507 results already appear in previous simulations with intermediate complexity models (Crucifix et al., 2002;  
508 Renssen et al., 2012). Using the more sophisticated model with a representation of different types of tree brings  
509 the new results that even though the total forest cover does not vary much throughout the Holocene in TRHOLV,  
510 the composition of the forest varies more substantially, with different relative timing between the different PFTs.  
511 The analysis of the linkage with long term climate trends, variability and internal vegetation instability would  
512 require further investigation. It would guide the development of methodologies to assess the vegetation  
513 instabilities in this region seen in the recent period (Abis and Brovkin, 2017), as well as the discussion on the  
514 internal instability of vegetation that could be partly driven by climate noise (Alexandrov et al., 2018). I might  
515 also be an important aspect to consider for future model data-comparison.

516 As discussed in section 3 and 4, the vegetation differences between PI-Vmap and Pi-VNone raise once  
517 more the possibility for multiple vegetation equilibrium under pre-industrial or modern conditions as it has been  
518 widely discussed previously (e.g. Brovkin et al., 2002; Claussen, 2009). Here we have both global and regional  
519 differences. Our results is however puzzling, because we only find limited differences between the PI-Vnone  
520 snapshot simulation and the PI climate and vegetation produced at the end of TRHOLV. These simulations start  
521 from the same initial state and in one case PI condition are switch on in the forcing, whereas the other case the  
522 6000 years long term forcing in insolation and trace gases is applied to the model. An ensemble of simulations  
523 would be needed to fully assess vegetation stability. In the northern hemisphere and over forest areas, MH-Vmap  
524 produced slightly less trees than MH-Vnone. It might have been amplified by snow albedo feedback under the PI  
525 conditions that are characterized by a colder than MH climate in high latitudes in response to reduced incoming  
526 solar radiation associated with lower obliquity. The differences between the southern and northern hemisphere  
527 characterized by large differences in grasses and bare soil are more difficult to understand and suggest different  
528 response to the changes in southern hemisphere seasonality. This is in favor of different equilibrium induced  
529 only partly by climate-vegetation feedback. We need also to raise the point that part of these differences could  
530 also be due to internal modeling and full consistency between the imposed and dynamical part of the system.  
531 However these would not explain why vegetation is sensitive to initial state in PI and not in MH. We would  
532 expect that similar differences would be found in that case between the two periods. It is also possible that the  
533 climate instability induced by the change from one year to the other in insolation and trace gazes lead to rapid  
534 amplification of climate in high latitude and that vegetation in the southern hemisphere move from one instable  
535 state to the over. The strongest conclusion from these simulations is that the vegetation-climate system is more

536 sensitive under the pre-industrial conditions (at least in the northern hemisphere latitudes). In depth analyses of  
537 the fast vegetation response and of its linkages/or not with interannual to multi-decadal variability is needed. The  
538 different time scales involved in this long term evolution can be seen as an interesting laboratory for further  
539 investigation in this respect.

540 In this study we also points on the difficulties to fully assess model results. The reason is that we only  
541 represent natural vegetation, and neglect land use and also aerosols other than dust and sea-salt. Therefore the PI  
542 and historical climate cannot be realistically reproduced, even though most of the characteristics we report are  
543 compatible with what has been observed. It also clearly shows that assessment of the magnitude of the simulated  
544 differences between MH and modern conditions depends on the reference period. This has implication for  
545 model-data comparisons, but also for reconstruction of temperature or moisture from paleoclimate archives that  
546 are in general calibrated using specific datasets. Similar methodologies for data sampling need thus to be applied  
547 both on paleoclimate records and on model outputs. It also suggest that more needs to be done to assess the  
548 processes leading to the observed changes rather than the changes themselves.

549 Since the MH-PI changes in climate and vegetation is similar in our simulation between snapshot  
550 experiments and a long transient simulation we can wonder what we learn out of this long simulation. What is  
551 the value added of a transient versus a snapshot experiment if climate differences are similar? Here also we do  
552 not have definitive answers. The good point is that model evaluation can be done on snapshot experiments,  
553 which fully validate the view that the mid-Holocene is a good period for model benchmarking in the  
554 Paleoclimate Modeling Intercomparison Project (Kageyama et al., 2018). However the MH – PI climate  
555 conditions mask the long term history and the relative timing of the changes. We also mainly consider here  
556 surface variables that have a rapid adjustment with the external forcing. In depth analyses of ice covered regions  
557 and of the ocean response would be needed to assess if this is valid for all the aspects of the climate system. Also  
558 we only consider long term trends in this study, but it shows that centennial variability plays an important role to  
559 shape the response of climate and vegetation to the Holocene external forcing at regional scale. Lots of changes  
560 can also be reported on interannual to multidecadal variability that would require further investigation. For these  
561 time scales further investigation is needed to tell if the characteristics of variability depends or not on the pace of  
562 climate change.

563  
564

## 565 **6 Annex**

### 566 **6.1 A1 Spatio-temporal agreement between model results and observations in the extratropics and** 567 **tropics**

568 Figure 3 highlights the model-observation agreement for the pre-industrial climate considering global  
569 metrics (Gleckler et al., 2016; Gleckler et al., 2008). Even though these metrics take into account the simulated  
570 patterns, it is possible that they do not capture well differences between model versions and between model and  
571 observations over part of the globe. We therefore complete the analyses by computing the same metrics (bias and  
572 root mean square) at the seasonal time scale and for 3 latitudinal bands. We restrict the figure to surface air  
573 temperature and precipitation that reflects well the differences. It shows that these measures capture differences  
574 between the IPSLCM4A-LR version of the IPSL model (Dufresne et al., 2013) and the new version developed

575 for the TRHOLV transient simulation (see section 2). It also highlights the impact of running the model with the  
576 dynamical vegetation. However, as in Figure 3 the simulations with different MH conditions for the interactive  
577 vegetation, as well as the PI conditions obtained after 5900 years of transient simulation are difficult to  
578 distinguish. Differences become significant again when considering the last 50 years of the transient simulations  
579 that are affected by increase greenhouse gases.

## 580 **6.2 A2 Biomization and sensitivity analysis.**

581 To convert the ORCHIDEE model PFTs into mega BIOMES we use the same algorithm than Zhu et al.  
582 (2018). Figure A1a shows the different thresholds used in the algorithm. The black numbers correspond to the  
583 default values used to produce Figure 6 in the main text. Since some of these thresholds are somehow artificially  
584 defined, we also tested the robustness of our comparison by running sensitivity tests. These test considered  
585 successively different threshold in Growing Degree Days above 5°C (GDD5), canopy height and foliage  
586 projective cover as indicated in red on figure A1a.

587 The different thresholds induce only slight difference on the BIOME map for a given simulation. The  
588 largest sensitivity is obtained for the height. When 10 m is used instead of 6 m, a larger cover of savannah and  
589 dry woodland is estimated from the simulations in mid and high norther latitudes. In these latitudes also a large  
590 sensitivity is found when the GDD5 limit is set to 500 °C. d<sup>-1</sup> instead of 350 °C.d<sup>-1</sup> between tundra and savanah  
591 and dry woodland or boreal forest.

592 The same analyses transformation into megabiomes was performed for the Vmap and Vnone  
593 simulations. Similar sensitivity is found to the different thresholds for these two simulations (figure A1b). The  
594 comparison of the different maps show that, as already stated from Figure 5, small differences can be found in  
595 the vegetation distribution, mainly on the forest cover in mid and high latitude. The synthesis of the goodness of  
596 fit between model and data in figure A1c. It shows that the two simulations provide as expected very similar  
597 results when compared to the BIOME6000 map. It is interesting to note that the different thresholds do not have  
598 a large impact on the model data comparison. The change in GDD5 limit produces tundra in better agreement  
599 with pollen data, and the canopy height better results with savannah and dry woodland. Note however that this  
600 result is in part due to the fact that there is little data in regions where the impact is the largest (Figure 6 in the  
601 main text).

602

603 *Acknowledgments.* We would like to thanks our colleagues from the IPSL global climate model group  
604 for their help in setting up this intermediate version of the IPSL model. In particular the ORCHIDEE group  
605 provided good advices for the closure of the hydrological cycle in the land surface scheme (Philippe Peylin,  
606 Agnès Ducharne, Frédéric Cheruy and Joséfine Gattas) or the snow ablation (Sylvie Charbit and Christophe  
607 Dumas). The workflow for these long simulations benefits from the development of Anne Cozic and Arnaud  
608 Caubel. Discussions with Philippe Ciais and Yves Balkansky were also at the origin of the choice of the land  
609 surface model complexity and aerosols forcing strategy. Pascale Braconnot and Olivier Marti have been awarded  
610 a PRACE computing allocation (THROL project) to start the simulations, as well as a GENCI specific high end  
611 computing allocation and normal allocation time (gen2212). This work is supported by the JPI-Belmont  
612 PACMEDY project (N ° ANR-15-JCLI-0003-01).

613



| Simulation                | Comment                                                                                                                           | Initial state                                                                    |
|---------------------------|-----------------------------------------------------------------------------------------------------------------------------------|----------------------------------------------------------------------------------|
| <b>midHolocene (MH)</b>   |                                                                                                                                   |                                                                                  |
| MH_PMIP3 *                | Reference PMIP3-CMIP5 IPSL simulation (Kageyama et al., 2013a)                                                                    | Previous MH long term simulation with the model used to test model configuration |
| MH_L11 (S_Sr01)           | As PMIP3, but with new version of land surface model (hydrology and snow model)                                                   | From the last MH test of the new model configuration (new version of ORCHIDEE)   |
| MH_L11Aer (S_Sr02)        | As L11, but only dust and sea-salt considered in the aerosol forcing                                                              | Same as L11                                                                      |
| MH_L11AerEv (S_Sr03)      | As L11aer, but with factor to limit bare soil evaporation                                                                         | From year 250 of L11Aer                                                          |
| MH_FPMIP4 (S_Sr04) *      | As L11AerEV, but with PMIP4 MH trace gases and Earth's orbital parameters. Reference MH simulation without interactive vegetation | From year 250 of L11AerEv                                                        |
| <b>Preindustrial (PI)</b> |                                                                                                                                   |                                                                                  |
| PI_PMIP3                  | Reference PMIP3-CMIP5 IPSL simulation (Dufresne et al., 2013; Kageyama et al., 2013a)                                             |                                                                                  |
| PI_FPMIP4                 | As L11AerEV but with pre industrial trace gases and Earth's orbital parameters                                                    |                                                                                  |

615

616 Table 1. Test done to set up the model with interactive vegetation. The different columns highlight the  
617 name of the test and the initial state to better isolate the different factors contributing to the adjustment curves in  
618 Figure 1. The simulations with an \* are considered as reference for the model version and the transient  
619 simulations. We include in parenthesis the tag of the simulation that corresponds to our internal nomenclature for  
620 memory.

621

| Simulation                 | Comment                                                                                                                                             | Initial state               |
|----------------------------|-----------------------------------------------------------------------------------------------------------------------------------------------------|-----------------------------|
| <b>Mid Holocene (MH)</b>   |                                                                                                                                                     |                             |
| MH-Vnone (V-Sr09)          | L11Aer configuration but initial state with bare soil everywhere                                                                                    | Year 250 of L11Aer          |
| MH-Vnone_FPMIP4 (V-Sr12)*  | Same simulation as MH-Vnone, but using the PMIP4 trace gazes forcing                                                                                | Year250 of MH-Vnone         |
| MH-Vmap (V_Sr10)           | As L11Aer, but vegetation map and soil initial state from an off line ORCHIDEE vegetation force with L11 pre-industrial simulation                  | Year 250 or L11Aer          |
| MH-Vmap_FPMIP4 (V_Sr11)    | Same simulation as MH-Vmap, but using the PMIP4 trace gazes forcing                                                                                 | Year 200 of MH-Vmap         |
| <b>Pre Industrial (PI)</b> |                                                                                                                                                     |                             |
| PI-Vnone (V_Sr12) *        | Preindustrial simulation corresponding to the MH simulations starting from bare soil                                                                | Year 500 of MH-Vnone-FPMIP4 |
| PI-Vmap (V_Sr07)           | Preindustrial simulation corresponding to the MH simulation starting from the off line ORCHIDEE vegetation force with L11 pre-industrial simulation | Year 250 of Vmap_FPMIP4     |
| Transient 6000 BP – 0 BP   |                                                                                                                                                     |                             |
| TRHOLV                     | Transient mid Holocene to present day simulation with dynamical vegetation                                                                          | Year 500 of MH-Vnone-FPMIP4 |

623

624

625

626

627

628

629

Table 2. Simulations run to initialize the dynamical vegetation starting from bare soil or from a vegetation map and soil moisture resulting from an off line ORCHIDEE simulation with dynamical vegetation switch on and using the PI L11 simulated climate as boundary conditions. Simulations with an \* are considered as references for the model version and the transient simulations. We include in parentheses the tag of the simulation that corresponds to our internal nomenclature for memory.

630 **7 Figure Caption**

631

632 Fig. 1: Mid Holocene annual mean precipitation ( $\text{mmd}^{-1}$ ) and 2m air temperature ( $^{\circ}\text{C}$ ) differences  
633 between a) FPMIP4 and PMIP3, b) L11 and PMIP3, c) L11Aer and L11 and d) L11AerAV and L11Aer. See  
634 Table 1 and text for the details about the different simulations.

635

636 Figure 2: Illustration of the effect of the different adjustments made to produce mid-Holocene  
637 simulations with the modified version of the IPSLCM5A-MR version of the IPSL model in which the land  
638 surface model ORCHIDEE includes a different soil hydrology and snow models (see text for details). The three  
639 panels show the global average of a) net surface heat flux ( $\text{W}\cdot\text{m}^{-2}$ ), b) evaporation ( $\text{kg}\cdot\text{m}^{-2}$ ), and c) 2m air  
640 temperature ( $^{\circ}\text{C}$ ). The different color lines represent the results for the different simulations reported in Table 1.

641

642 Figure 3. a) Annual mean global model bias ( $\text{bias}_{xy}$ ) and b) spatio-temporal root mean square  
643 differences ( $\text{rms}_{xyt}$ ) computed on the annual cycle (twelve climatological months) over the globe for the  
644 different pre-industrial simulations considered in this manuscript (color lines) and individual simulations of the  
645 CMIP5 multi-model ensembles (grey lines). The metrics for the different variables are presented as parallel  
646 coordinates, each of them having their own vertical axis with corresponding values. In these plots  $t_a$  stands for  
647 temperature ( $^{\circ}\text{C}$ ) with  $s$  for surface, 850 and 200 for 850 and 300 hPa,  $prw$  for total water content,  $pr$  for  
648 precipitation ( $\text{mmd}^{-1}$ ),  $rlut$ , for outgoing long wave radiation,  $rltcre$  and  $rltcre$  for the cloud radiative effect at the  
649 top of the atmosphere in the short wave and long wave radiation respectively ( $\text{W}\cdot\text{m}^{-2}$ ).

650

651 Figure 4. Long term adjustment of vegetation for mid Holocene when starting from bare soil ( $V_{\text{none}}$ ) or  
652 from a vegetation map ( $V_{\text{map}}$ ). The 13 ORCHIDEE PFT have been gathered as bare soil, grass, tree and land-  
653 use. When the dynamical vegetation is active only natural vegetation is considered. Land-use is thus only present  
654 in one simulation, corresponding to a pre-industrial map used as reference in the IPSL model (Dufresne et al.  
655 2013). The corresponding vegetation is referred to as  $PI_{\text{prescribed}}$ . Following Table 2, MH and PI refer to  
656 midHolocene and Pre industrial control simulations respectively. The x axis is in months, starting from 0.

657

658 Figure 5: Vegetation maps obtained with the two different initial states for a) d) g) mid Holocene  
659 simulations, b) e) h) pre-industrial simulations and c) f) i) pre-industrial simulation for  $V_{\text{none}}$ .  $V_{\text{map}}$  stands for  
660 simulations where the mid-Holocene vegetation has been initialized from a vegetation map and  $V_{\text{none}}$  for  
661 simulations where the mid-Holocene has been initialized from bare soil. For simplicity we only consider  
662 fractions of a) b) c) bare soil, d) e) f) grass and g) h) i) trees.

663

664 Figure 6: Impact of the dynamical vegetation and initialization of vegetation on the simulated climate.  
665 Differences for annual mean a) c) e) precipitation ( $\text{mm}\cdot\text{d}^{-1}$ ) and b) d) f) 2m air temperature ( $^{\circ}\text{C}$ ) between a) and b)  
666 the mid Holocene simulation with dynamical vegetation (MH- $V_{\text{None}}$ ) and the mid Holocene simulation without  
667 (MH FPMIP4), d) and d) the mid Holocene (MH- $V_{\text{none}}$ ) and the pre-industrial (PI- $V_{\text{none}}$ ) simulations with  
668 bare soil as initial state for vegetation, and e) and f) the two pre-industrial simulations initialized from bare soil  
669 (PI- $V_{\text{none}}$ ) or a vegetation map for vegetation (PI- $V_{\text{map}}$ ). See table 2 and text for details on the simulations.

670 Figure 7: (a) Simulated megabiome distribution by MH\_Vnone, converted from the modelled PFT  
671 properties using the default algorithm described in Figure A1. (b) Reconstructions in BIOME 6000 DB version 1  
672 (Harrison, 2017). (c) Number of pixels where reconstruction is available and the model matches (or does not  
673 match) the data. Note that multiple reconstruction sites may be located in the same model grid cell, in which case  
674 we did not group them so that each site was counted once. Numbers in parenthesis on the x axis in c) represent  
675 the number of sites for each biome type.

676  
677 Figure 8: Comparison of the change in vegetation between mid Holocene and preindustrial climate in  
678 the two sets of experiments where the only difference is the way vegetation has been initialised for the mid-  
679 Holocene simulation. In a) c) e) Vmap correspond to simulations where the MH simulation has been initialized  
680 from a map and in b) d) f) Vnone to simulations where it has been initialized from baresoil. For simplicity we  
681 only consider fractions of a) b) bare soil, c) d) grass and e) f) trees.

682  
683 Figure 9: Evolution of trace gases : CO<sub>2</sub> (ppm), CH<sub>4</sub> (ppb) and N<sub>2</sub>O (ppb), following Otto-Bliesner et al.  
684 (2017).

685  
686 Figure 10. Long term evolution of incoming solar radiation at the top of the atmosphere (TOA)(Wm<sup>-2</sup>,  
687 top panel) and associated response of temperature (°C) and precipitation (mm.y<sup>-1</sup>) expressed as a difference with  
688 the 6000 year PB initial state and smoothed by a 100 year running mean) for a) NH Summer, b) Northern  
689 hemisphere winter, c) Southern Hemisphere summer, and d) Southern Hemisphere winter. Temperatures are  
690 plotted in red and precipitation in blue for summer, and they are respectively plotted in orange and green for  
691 winter. NH Summer and SH Winter correspond to June to September averages whereas NH winter and SH  
692 summer correspond to December to March averages. All curves, except insolation have been smoothed by a 100  
693 year running mean.

694  
695 Figure 11: Long term evolution of the simulated a) baresoil, b) grass and c) tree covers, expressed as the  
696 percentage (%) of Global, Northern Hemisphere or Southern Hemisphere continental areas, and d) GPP (PgC/y)  
697 over the same regions. Annual mean values are smoothed by a 100 year running mean.

698  
699 Figure 12 : Long term evolution of Baresoil, grass and Tre, expressed as the % of land cover North of  
700 60°N, over Eurasia and over West Africa. The different values are plotted as differences with the first 100 year  
701 averages. A 100 year running mean is applied to the curves before plotting.

702  
703 Figure 13. Long term evolution of total GPP (PgC/y for land surfaces north of 60°N (blue) Eurasia  
704 (cyan), and W Africa (pink). Annual mean values are smoothed by a 100 yr running mean.

705  
706 Figure 14: Vegetation map comparing a) the Mid Holocene (1<sup>st</sup> 50 years) and the pre-industrial (50  
707 year around 1850 AC (last 150 to 100 years) periods of the transient simulation , b) the difference between pre-  
708 industrial climate for the transient simulation and the Vnone simulations, and c) the differences between the

709 historical period (last 50 years) and the pre-industrial period of the transient simulation. For simplicity we only  
710 consider bare soil (top), grass (middle) and tree (bottom).

711  
712 Figure 15 : Evolution of the different tree PFTs in Eurasia, expressed as the percentage change  
713 compared to their 6000 year BP initial state.. Each color line stands for a different PFT. Values have been  
714 smoothed by a 100 year running mean.

715  
716 Figure A1: Parrallel coordinate representation of metrics highlighting model mean bias (left column)  
717 and spatial root mean square differences (right column) against observations for the four climatological seasons  
718 (December to February, djf; Mars to May, mam; June to August, jja ; September to November, son) for surface  
719 air temperature (tas, °C) and precipitation,  $\text{mmd}^{-1}$ ) and Northern Hemisphere extra tropics (NHEX, 20°N-90°N),  
720 Tropics (20°S-20°N), and Southern Hemisphere extra tropics (SHEX 90°S-20°S). Each color line stands for a  
721 simulations discussed in this manuscript. The results of the different CMIP5 simulations (grey lines) are included  
722 for comparison.

723  
724 Figure A2 : (a) Algorithm to convert the modelled PFT properties into the eight megabiomes provided  
725 by BIOME 6000 DB version 1. The default thresholds (in black) are the same as Zhu et al. (2018), while  
726 different values (in red) are tested:  $\text{GDD}_5$  (annual growing degree days above 5 °C) of 500 K days (Joos et al.,  
727 2004), FPC (foliage projective cover) of 0.3 and 0.6 (Prentice et al., 2011) Height (average height of all existing  
728 tree PFTs) of 10 m (Prentice et al., 2011). (b) Simulated megabiome distribution by MH\_Vnone and MH\_Vmap,  
729 using different conversion methods in (a). (c) The number of pixels where modelled megabiome matches data  
730 for each biome type, divided by the total number of available sites for that biome type.

731  
732  
733  
734  
735

- 737  
738 Abis, B. and Brovkin, V.: Environmental conditions for alternative tree-cover states in high latitudes,  
739 *Biogeosciences*, 14, 511-527, 2017.
- 740 Albani, S., Mahowald, N. M., Winckler, G., Anderson, R. F., Bradtmiller, L. I., Delmonte, B., François,  
741 R., Goman, M., Heavens, N. G., Hesse, P. P., Hovan, S. A., Kang, S. G., Kohfeld, K. E., Lu, H., Maggi, V.,  
742 Mason, J. A., Mayewski, P. A., McGee, D., Miao, X., Otto-Bliesner, B. L., Perry, A. T., Pourmand, A.,  
743 Roberts, H. M., Rosenbloom, N., Stevens, T., and Sun, J.: Twelve thousand years of dust: the  
744 Holocene global dust cycle constrained by natural archives, *Clim. Past*, 11, 869-903, 2015.
- 745 Alexandrov, D. V., Bashkirtseva, I. A., and Ryashko, L. B.: Noise-induced transitions and shifts in a  
746 climate–vegetation feedback model, *Royal Society Open Science*, 5, 2018.
- 747 Aumont, O. and Bopp, L.: Globalizing results from ocean in situ iron fertilization studies, *Global*  
748 *Biogeochemical Cycles*, 20, -, 2006.
- 749 Bartlein, P. J., Harrison, S. P., Brewer, S., Connor, S., Davis, B. A. S., Gajewski, K., Guiot, J., Harrison-  
750 Prentice, T. I., Henderson, A., Peyron, O., Prentice, I. C., Scholze, M., Seppa, H., Shuman, B., Sugita,  
751 S., Thompson, R. S., Vial, A. E., Williams, J., and Wu, H.: Pollen-based continental climate  
752 reconstructions at 6 and 21 ka: a global synthesis, *Climate Dynamics*, 37, 775-802, 2011.
- 753 Bathiany, S., Claussen, M., and Fraedrich, K.: Implications of climate variability for the detection of  
754 multiple equilibria and for rapid transitions in the atmosphere-vegetation system, *Climate*  
755 *Dynamics*, 38, 1775-1790, 2012.
- 756 Berger, A.: Long-term variations of caloric solar radiation resulting from the Earth's orbital elements,  
757 *Quaternary Research*, 9, 139-167, 1978.
- 758 Bigelow, N. H., Brubaker, L. B., Edwards, M. E., Harrison, S. P., Prentice, I. C., Anderson, P. M.,  
759 Andreev, A. A., Bartlein, P. J., Christensen, T. R., Cramer, W., Kaplan, J. O., Lozhkin, A. V.,  
760 Matveyeva, N. V., Murray, D. F., McGuire, A. D., Razzhivin, V. Y., Ritchie, J. C., Smith, B., Walker, D.  
761 A., Gajewski, K., Wolf, V., Holmqvist, B. H., Igarashi, Y., Kremenetskii, K., Paus, A., Pisaric, M. F. J.,  
762 and Volkova, V. S.: Climate change and Arctic ecosystems: 1. Vegetation changes north of 55  
763 degrees N between the last glacial maximum, mid-Holocene, and present, *Journal of Geophysical*  
764 *Research-Atmospheres*, 108, 2003.
- 765 Boisier, J., Noblet - Ducoudré, N. d., Pitman, A., Cruz, F., Delire, C., den Hurk, B., Molen, M., Müller,  
766 C., and Voltaire, A.: Attributing the impacts of land - cover changes in temperate regions on  
767 surface temperature and heat fluxes to specific causes: Results from the first LUCID set of  
768 simulations, *Journal of Geophysical Research: Atmospheres*, 117, 2012.
- 769 Bonfils, C., de Noblet-Ducoudré, N., Braconnot, P., and Joussaume, S.: Hot desert albedo and climate  
770 change: Mid-Holocene monsoon in North Africa, *Journal of Climate*, 14, 3724-3737, 2001.
- 771 Braconnot, P., Harrison, S. P., Kageyama, M., Bartlein, P. J., Masson-Delmotte, V., Abe-Ouchi, A.,  
772 Otto-Bliesner, B., and Zhao, Y.: Evaluation of climate models using palaeoclimatic data, *Nature*  
773 *Climate Change*, 2, 417-424, 2012.
- 774 Braconnot, P., Joussaume, S., Marti, O., and de Noblet, N.: Synergistic feedbacks from ocean and  
775 vegetation on the African monsoon response to mid-Holocene insolation, *Geophys .Res. Lett.*, 26,  
776 2481-2484, 1999.
- 777 Braconnot, P. and Kageyama, M.: Shortwave forcing and feedbacks in Last Glacial Maximum and Mid-  
778 Holocene PMIP3 simulations, *Phil. Trans. R. Soc. A*, 373, 20140424, 2015.
- 779 Braconnot, P., Marti, O., and Joussaume, S.: Adjustment and feedbacks in a global coupled ocean-  
780 atmosphere model, *Climate Dynamics*, 13, 507-519, 1997.
- 781 Braconnot, P., Otto-Bliesner, B., Harrison, S., Joussaume, S., Peterchmitt, J. Y., Abe-Ouchi, A., Crucifix,  
782 M., Driesschaert, E., Fichet, T., Hewitt, C. D., Kageyama, M., Kitoh, A., Laine, A., Loutre, M. F.,  
783 Marti, O., Merkel, U., Ramstein, G., Valdes, P., Weber, S. L., Yu, Y., and Zhao, Y.: Results of PMIP2  
784 coupled simulations of the Mid-Holocene and Last Glacial Maximum - Part 1: experiments and  
785 large-scale features, *Climate of the Past*, 3, 261-277, 2007a.

786 Braconnot, P., Otto-Bliesner, B., Harrison, S., Joussaume, S., Peterchmitt, J. Y., Abe-Ouchi, A., Crucifix,  
787 M., Driesschaert, E., Fichefet, T., Hewitt, C. D., Kageyama, M., Kitoh, A., Loutre, M. F., Marti, O.,  
788 Merkel, U., Ramstein, G., Valdes, P., Weber, L., Yu, Y., and Zhao, Y.: Results of PMIP2 coupled  
789 simulations of the Mid-Holocene and Last Glacial Maximum - Part 2: feedbacks with emphasis on  
790 the location of the ITCZ and mid- and high latitudes heat budget, *Climate of the Past*, 3, 279-296,  
791 2007b.

792 Brovkin, V., Bendtsen, J., Claussen, M., Ganopolski, A., Kubatzki, C., Petoukhov, V., and Andreev, A.:  
793 Carbon cycle, vegetation, and climate dynamics in the Holocene: Experiments with the CLIMBER-2  
794 model, *Global Biogeochemical Cycles*, 16, 2002.

795 Campbell, J. E., Berry, J. A., Seibt, U., Smith, S. J., Montzka, S. A., Launois, T., Belviso, S., Bopp, L., and  
796 Laine, M.: Large historical growth in global terrestrial gross primary production, *Nature*, 544, 84,  
797 2017.

798 Claussen, M.: Late Quaternary vegetation-climate feedbacks, *Climate of the Past*, 5, 203-216, 2009.

799 Claussen, M. and Gayler, V.: The greening of the Sahara during the mid-Holocene: results of an  
800 interactive atmosphere-biome model, *Global Ecology and Biogeography Letters*, 6, 369-377, 1997.

801 COHMAP-Members: Climatic changes of the last 18,000 years: observations and model simulations,  
802 *Science*, 241, 1043-1052, 1988.

803 Crucifix, M., Loutre, M. F., Tulkens, P., Fichefet, T., and Berger, A.: Climate evolution during the  
804 Holocene: a study with an Earth system model of intermediate complexity, *Climate Dynamics*, 19,  
805 43-60, 2002.

806 d'Orgeval, T., Polcher, J., and de Rosnay, P.: Sensitivity of the West African hydrological cycle in  
807 ORCHIDEE to infiltration processes, *Hydrol. Earth Syst. Sci.*, 12, 1387-1401, 2008.

808 Dallmeyer, A., Claussen, M., and Otto, J.: Contribution of oceanic and vegetation feedbacks to  
809 Holocene climate change in monsoonal Asia, *Clim. Past*, 6, 195-218, 2010.

810 Davis, B. A. S., Brewer, S., Stevenson, A. C., and Guiot, J.: The temperature of Europe during the  
811 Holocene reconstructed from pollen data, *Quaternary Science Reviews*, 22, 1701-1716, 2003.

812 de Noblet-Ducoudre, N., Claussen, R., and Prentice, C.: Mid-Holocene greening of the Sahara: first  
813 results of the GAIM 6000 year BP Experiment with two asynchronously coupled atmosphere/biome  
814 models, *Climate Dynamics*, 16, 643-659, 2000.

815 de Noblet, N., Prentice, I. C., Joussaume, S., Texier, D., Botta, A., and Haxeltine, A.: Possible role of  
816 atmosphere-biosphere interactions in triggering the last glaciation, *Geophys. Res. Letters*, 23, 3191-  
817 3194, 1996.

818 de Rosnay, P., Polcher, J., Bruen, M., and Laval, K.: Impact of a physically based soil water flow and  
819 soil-plant interaction representation for modeling large-scale land surface processes, *Journal of*  
820 *Geophysical Research-Atmospheres*, 107, 2002.

821 deMenocal, P., Ortiz, J., Guilderson, T., Adkins, J., Sarnthein, M., Baker, L., and Yarusinsky, M.: Abrupt  
822 onset and termination of the African Humid Period: rapid climate responses to gradual insolation  
823 forcing, *Quaternary Science Reviews*, 19, 347-361, 2000.

824 Ducoudré, N., Laval, K., and Perrier, A.: SECHIBA, a new set of parameterizations of the hydrologic  
825 exchanges at the land/atmosphere interface within the LMD atmospheric general circulation  
826 model, *Journal of Climate*, 6, 1993.

827 Dufresne, J. L., Foujols, M. A., Denvil, S., Caubel, A., Marti, O., Aumont, O., Balkanski, Y., Bekki, S.,  
828 Bellenger, H., Benshila, R., Bony, S., Bopp, L., Braconnot, P., Brockmann, P., Cadule, P., Cheruy, F.,  
829 Codron, F., Cozic, A., Cugnet, D., de Noblet, N., Duvel, J. P., Ethe, C., Fairhead, L., Fichefet, T.,  
830 Flavoni, S., Friedlingstein, P., Grandpeix, J. Y., Guez, L., Guilyardi, E., Hauglustaine, D., Hourdin, F.,  
831 Idelkadi, A., Ghattas, J., Joussaume, S., Kageyama, M., Krinner, G., Labetoulle, S., Lahellec, A.,  
832 Lefebvre, M. P., Lefevre, F., Levy, C., Li, Z. X., Lloyd, J., Lott, F., Madec, G., Mancip, M., Marchand,  
833 M., Masson, S., Meurdesoif, Y., Mignot, J., Musat, I., Parouty, S., Polcher, J., Rio, C., Schulz, M.,  
834 Swingedouw, D., Szopa, S., Talandier, C., Terray, P., Viovy, N., and Vuichard, N.: Climate change  
835 projections using the IPSL-CM5 Earth System Model: from CMIP3 to CMIP5, *Climate Dynamics*, 40,  
836 2123-2165, 2013.

837 Egerer, S., Claussen, M., Reick, C., and Stanelle, T.: Could gradual changes in Holocene Saharan  
838 landscape have caused the observed abrupt shift in North Atlantic dust deposition?, *Earth and*  
839 *Planetary Science Letters*, 473, 104-112, 2017.

840 Fichet, T. and Maqueda, M. A. M.: Modelling the influence of snow accumulation and snow-ice  
841 formation on the seasonal cycle of the Antarctic sea-ice cover, *Climate Dynamics*, 15, 251-268,  
842 1999.

843 Gleckler, P., Doutriaux, C., Durack, P., Taylor, K., Zhang, Y., Williams, D., Mason, E., and Servonnat, J.:  
844 A More Powerful Reality Test for Climate Models, *EOS, Transactions of the American Geophysical*  
845 *Union*, 97, 2016.

846 Gleckler, P. J., Taylor, K. E., and Doutriaux, C.: Performance metrics for climate models, *Journal of*  
847 *Geophysical Research-Atmospheres*, 113, -, 2008.

848 Guimberteau, M., Zhu, D., Maignan, F., Huang, Y., Yue, C., Dantec-Nédélec, S., Ottlé, C., Jornet-Puig,  
849 A., Bastos, A., Laurent, P., Goll, D., Bowring, S., Chang, J., Guenet, B., Tifafi, M., Peng, S., Krinner, G.,  
850 Ducharne, A., Wang, F., Wang, T., Wang, X., Wang, Y., Yin, Z., Lauerwald, R., Joetzjer, E., Qiu, C.,  
851 Kim, H., and Ciais, P.: ORCHIDEE-MICT (v8.4.1), a land surface model for the high latitudes: model  
852 description and validation, *Geosci. Model Dev.*, 11, 121-163, 2018.

853 Harrison, S.: BIOME 6000 DB classified plotfile version 1, University of Reading. Dataset. , doi:  
854 <http://dx.doi.org/10.17864/1947.99>, 2017. 2017.

855 Harrison, S. P., Bartlein, P. J., Brewer, S., Prentice, I. C., Boyd, M., Hessler, I., Holmgren, K., Izumi, K.,  
856 and Willis, K.: Climate model benchmarking with glacial and mid-Holocene climates, *Climate*  
857 *Dynamics*, 43, 671-688, 2014.

858 Harrison, S. P., Jolly, D., Laarif, F., Abe-Ouchi, A., Dong, B., Herterich, K., Hewitt, C., Jousaume, S.,  
859 Kutzbach, J. E., Mitchell, J., de Noblet, N., and Valdes, P.: Intercomparison of Simulated Global  
860 Vegetation Distributions in Response to 6 kyr BP Orbital Forcing, *Journal of Climate*, 11, 2721-2742,  
861 1998.

862 Held, I. M. and Soden, B. J.: Robust Responses of the Hydrological Cycle to Global Warming, *Journal*  
863 *of Climate*, 19, 5686-5699, 2006.

864 Hély, C. and Lézine, A.-M.: Holocene changes in African vegetation: tradeoff between climate and  
865 water availability, *Climate of the Past*, 10, 681-686, 2014.

866 Hopcroft, P. O., Valdes, P. J., Harper, A. B., and Beerling, D. J.: Multi vegetation model evaluation of  
867 the Green Sahara climate regime, *Geophysical Research Letters*, 44, 6804-6813, 2017.

868 Hourdin, F., Foujols, M. A., Codron, F., Guemas, V., Dufresne, J. L., Bony, S., Denvil, S., Guez, L., Lott,  
869 F., Ghattas, J., Braconnot, P., Marti, O., Meurdesoif, Y., and Bopp, L.: Impact of the LMDZ  
870 atmospheric grid configuration on the climate and sensitivity of the IPSL-CM5A coupled model,  
871 *Climate Dynamics*, 40, 2167-2192, 2013.

872 Jansen, E., Overpeck, J., Briffa, K. R., Duplessy, J. C., Joos, F., Masson-Delmotte, V., Olago, D., Otto-  
873 Bliesner, B., Peltier, W. R., Rahmstorf, S., Ramesh, R., Raynaud, D., Rind, D., Solomina, O., Villalba,  
874 R., and Zhang, D.: Paleoclimate. In: *Climate Change 2007: The Physical Science Basis. Contribution of*  
875 *Working Group I to the Fourth Assessment Report of the Intergovernmental Panel on Climate*  
876 *Change*, Solomon, S., Qin, D. H., Manning, M., Chen, Z., Marsuis, M., Averyt, K. B., Tignor, M., and  
877 Miller, H. L. (Eds.), Cambridge University Press, Cambridge, United Kingdom and New York, NY, USA,  
878 2007.

879 Jolly, D., Prentice, I. C., Bonnefille, R., Ballouche, A., Bengo, M., Brenac, P., Buchet, G., Burney, D.,  
880 Cazet, J.-P., Cheddadi, R., Edohr, T., Elenga, H., Elmoutaki, S., Guiot, J., Laarif, F., Lamb, H., Lézine,  
881 A.-M., Maley, J., Mbenza, M., Peyron, O., Reille, M., Reynaud-Ferrera, I., Riollet, G., Ritchie, J. C.,  
882 Roche, E., Scott, L., Ssemmanda, I., Straka, H., Umer, M., Van Campo, E., Vilimumbala, S., Vincens,  
883 A., and Waller, M.: Biome reconstruction from pollen and plant macrofossil data for Africa and the  
884 Arabian peninsula at 0 and 6 ka., *Journal of Biogeography*, 25, 1007-1028, 1998.

885 Joos, F., Gerber, S., Prentice, I., Otto-Bliesner, B., and Valdes, P.: Transient simulations of Holocene  
886 atmospheric carbon dioxide and terrestrial carbon since the Last Glacial Maximum, *GLOBAL*  
887 *BIOGEOCHEMICAL CYCLES*, 18, -, 2004.



888 Joos, F. and Spahni, R.: Rates of change in natural and anthropogenic radiative forcing over the past  
889 20,000 years, *Proceedings of the National Academy of Sciences*, 105, 1425-1430, 2008.

890 Kageyama, M., Braconnot, P., Bopp, L., Caubel, A., Foujols, M. A., Guilyardi, E., Khodri, M., Lloyd, J.,  
891 Lombard, F., Mariotti, V., Marti, O., Roy, T., and Woillez, M. N.: Mid-Holocene and Last Glacial  
892 Maximum climate simulations with the IPSL model-part I: comparing IPSL\_CM5A to IPSL\_CM4,  
893 *Climate Dynamics*, 40, 2447-2468, 2013a.

894 Kageyama, M., Braconnot, P., Bopp, L., Mariotti, V., Roy, T., Woillez, M. N., Caubel, A., Foujols, M. A.,  
895 Guilyardi, E., Khodri, M., Lloyd, J., Lombard, F., and Marti, O.: Mid-Holocene and last glacial  
896 maximum climate simulations with the IPSL model: part II: model-data comparisons, *Climate  
897 Dynamics*, 40, 2469-2495, 2013b.

898 Kageyama, M., Braconnot, P., Harrison, S. P., Haywood, A. M., Jungclaus, J. H., Otto-Bliesner, B. L.,  
899 Peterschmitt, J. Y., Abe-Ouchi, A., Albani, S., Bartlein, P. J., Brierley, C., Crucifix, M., Dolan, A.,  
900 Fernandez-Donado, L., Fischer, H., Hopcroft, P. O., Ivanovic, R. F., Lambert, F., Lunt, D. J.,  
901 Mahowald, N. M., Peltier, W. R., Phipps, S. J., Roche, D. M., Schmidt, G. A., Tarasov, L., Valdes, P. J.,  
902 Zhang, Q., and Zhou, T.: The PMIP4 contribution to CMIP6 – Part 1: Overview and over-arching  
903 analysis plan, *Geosci. Model Dev.*, 11, 1033-1057, 2018.

904 Krinner, G., Viovy, N., de Noblet-Ducoudre, N., Ogee, J., Polcher, J., Friedlingstein, P., Ciais, P., Sitch,  
905 S., and Prentice, I. C.: A dynamic global vegetation model for studies of the coupled atmosphere-  
906 biosphere system, *Global Biogeochemical Cycles*, 19, -, 2005.

907 Kutzbach, J. E., Bartlein, P. J., Foley, J. A., Harrison, S. P., Hostetler, S. W., Liu, Z., Prentice, I. C., and  
908 Webb, T.: Potential role of vegetation feedback in the climate sensitivity of high-latitude regions: A  
909 case study at 6000 years BP, *Global Biogeochemical Cycles*, 10, 727-736, 1996.

910 Lenton, T. M., Held, H., Kriegler, E., Hall, J. W., Lucht, W., Rahmstorf, S., and Schellnhuber, H. J.:  
911 Tipping elements in the Earth's climate system, *Proceedings of the National Academy of Sciences*,  
912 105, 1786-1793, 2008.

913 Levis, S., Bonan, G. B., and Bonfils, C.: Soil feedback drives the mid-Holocene North African monsoon  
914 northward in fully coupled CCSM2 simulations with a dynamic vegetation model, *Climate Dynamics*,  
915 23, 791-802, 2004.

916 Lezine, A. M., Hely, C., Grenier, C., Braconnot, P., and Krinner, G.: Sahara and Sahel vulnerability to  
917 climate changes, lessons from Holocene hydrological data, *Quaternary Science Reviews*, 30, 3001-  
918 3012, 2011.

919 Lezine, A. M., Ivory, S. J., Braconnot, P., and Marti, O.: Timing of the southward retreat of the ITCZ at  
920 the end of the Holocene Humid Period in Southern Arabia: Data-model comparison, *Quaternary  
921 Science Reviews*, 164, 68-76, 2017.

922 Liu, Z., Wang, Y., Gallimore, R., Gasse, F., Johnson, T., deMenocal, P., Adkins, J., Notaro, M., Prentice,  
923 I. C., Kutzbach, J., Jacob, R., Behling, P., Wang, L., and Ong, E.: Simulating the transient evolution  
924 and abrupt change of Northern Africa atmosphere-ocean-terrestrial ecosystem in the Holocene,  
925 *Quaternary Science Reviews*, 26, 1818-1837, 2007.

926 Madec, G.: NEMO ocean engine, 2008.

927 Marsicek, J., Shuman, B. N., Bartlein, P. J., Shafer, S. L., and Brewer, S.: Reconciling divergent trends  
928 and millennial variations in Holocene temperatures, *Nature*, 554, 92, 2018.

929 Marti, O., Braconnot, P., Dufresne, J. L., Bellier, J., Benshila, R., Bony, S., Brockmann, P., Cadule, P.,  
930 Caubel, A., Codron, F., de Noblet, N., Denvil, S., Fairhead, L., Fichefet, T., Foujols, M. A.,  
931 Friedlingstein, P., Goosse, H., Grandpeix, J. Y., Guilyardi, E., Hourdin, F., Idelkadi, A., Kageyama, M.,  
932 Krinner, G., Levy, C., Madec, G., Mignot, J., Musat, I., Swingedouw, D., and Talandier, C.: Key  
933 features of the IPSL ocean atmosphere model and its sensitivity to atmospheric resolution, *Climate  
934 Dynamics*, 34, 1-26, 2010.

935 Mauri, A., Davis, B., Collins, P., and Kaplan, J.: The climate of Europe during the Holocene: a gridded  
936 pollen-based reconstruction and its multi-proxy evaluation, *Quaternary Science Reviews*, 112, 109-  
937 127, 2015.

938 Otto-Bliesner, B., Braconnot, P., Harrison, S., Lunt, D., Abe-Ouchi, A., Albani, S., Bartlein, P., Capron,  
939 E., Carlson, A., Dutton, A., Fischer, H., Goelzer, H., Govin, A., Haywood, A., Joos, F., LeGrande, A.,

940 Lipscomb, W., Lohmann, G., Mahowald, N., Nehrbass-Ahles, C., Pausata, F., Peterschmitt, J.-Y.,  
941 Phipps, S., Renssen, H., and Zhang, Q.: The PMIP4 contribution to CMIP6 – Part 2: Two interglacials,  
942 scientific objective and experimental design for Holocene and Last Interglacial simulations,  
943 *Geoscientific Model Development*, 10, 3979-4003, 2017.

944 Otto, J., Raddatz, T., and Claussen, M.: Strength of forest-albedo feedback in mid-Holocene climate  
945 simulations, *Clim. Past*, 7, 1027-1039, 2011.

946 Otto, J., Raddatz, T., Claussen, M., Brovkin, V., and Gayler, V.: Separation of atmosphere-ocean-  
947 vegetation feedbacks and synergies for mid-Holocene climate, *Geophysical Research Letters*, 36,  
948 2009.

949 Pausata, F. S., Messori, G., and Zhang, Q.: Impacts of dust reduction on the northward expansion of  
950 the African monsoon during the Green Sahara period, *Earth and Planetary Science Letters*, 434,  
951 298-307, 2016.

952 Prentice, I. C., Harrison, S. P., and Bartlein, P. J.: Global vegetation and terrestrial carbon cycle  
953 changes after the last ice age, *New Phytologist*, 189, 988-998, 2011.

954 Prentice, I. C. and Webb, T.: BIOME 6000: reconstructing global mid-Holocene vegetation patterns  
955 from palaeoecological records, *Journal of Biogeography*, 25, 997-1005, 1998.

956 Renssen, H., Seppä, H., Crosta, X., Goosse, H., and Roche, D. M.: Global characterization of the  
957 Holocene Thermal Maximum, *Quaternary Science Reviews*, 48, 7-19, 2012.

958 Saint-Lu, M., Braconnot, P., Leloup, J., and Marti, O.: The role of El Niño in the global energy  
959 redistribution: a case study in the mid-Holocene, *Climate Dynamics*, 2016. 1-18, 2016.

960 Scheffer, M., Hirota, M., Holmgren, M., Van Nes, E. H., and Chapin, F. S.: Thresholds for boreal biome  
961 transitions, *Proceedings of the National Academy of Sciences*, 109, 21384-21389, 2012.

962 Singarayer, J. S. and Valdes, P. J.: High-latitude climate sensitivity to ice-sheet forcing over the last  
963 120 kyr, *Quaternary Science Reviews*, 29, 43-55, 2010.

964 Texier, D., de Noblet, N., Harrison, S. P., Haxeltine, A., Jolly, D., Joussaume, S., Laarif, F., Prentice, I. C.,  
965 and Tarasov, P.: Quantifying the role of biosphere-atmosphere feedbacks in climate change:  
966 coupled model simulations for 6000 years BP and comparison with palaeodata for northern Eurasia  
967 and northern Africa, *Climate Dynamics*, 13, 865-882, 1997.

968 Torres, O., Braconnot, P., Marti, O., and Gentil, L.: Impact of air-sea drag coefficient for latent heat  
969 flux on large scale climate in coupled and atmosphere stand-alone simulations, *Climate Dynamics*,  
970 2018. 1-20, 2018.

971 Valcke, S.: OASIS3 user's guide (prism-2-5). CERFACS, Toulouse, France, 2006.

972 Vial, J., Dufresne, J. L., and Bony, S.: On the interpretation of inter-model spread in CMIP5 climate  
973 sensitivity estimates, *Climate Dynamics*, 41, 3339-3362, 2013.

974 Viovy, N.: CRUNCEP Version 7 - Atmospheric Forcing Data for the Community Land Model. Research  
975 Data Archive at the National Center for Atmospheric Research, Computational and Information  
976 Systems Laboratory, Boulder, CO, 2018.

977 Wang, T., Ottlé, C., Boone, A., Ciais, P., Brun, E., Morin, S., Krinner, G., Piao, S., and Peng, S.:  
978 Evaluation of an improved intermediate complexity snow scheme in the ORCHIDEE land surface  
979 model, *Journal of Geophysical Research: Atmospheres*, 118, 6064-6079, 2013.

980 Wanner, H., Beer, J., Buetikofer, J., Crowley, T. J., Cubasch, U., Flueckiger, J., Goosse, H., Grosjean,  
981 M., Joos, F., Kaplan, J. O., Kuettel, M., Mueller, S. A., Prentice, I. C., Solomina, O., Stocker, T. F.,  
982 Tarasov, P., Wagner, M., and Widmann, M.: Mid- to Late Holocene climate change: an overview,  
983 *Quaternary Science Reviews*, 27, 1791-1828, 2008.

984 Wohlfahrt, J., Harrison, S. P., and Braconnot, P.: Synergistic feedbacks between ocean and vegetation  
985 on mid- and high-latitude climates during the mid-Holocene, *Climate Dynamics*, 22, 223-238, 2004.

986 Woillez, M., Kageyama, M., Krinner, G., De Noblet-Ducoudré, N., Viovy, N., and Mancip, M.: Impact of  
987 CO<sub>2</sub> and climate on the Last Glacial Maximum vegetation: results from the ORCHIDEE/IPSL models,  
988 *Climate of the Past*, 7, 557-577, 2011.

989 Zhu, D., Ciais, P., Chang, J., Krinner, G., Peng, S., Viovy, N., Peñuelas, J., and Zimov, S.: The large mean  
990 body size of mammalian herbivores explains the productivity paradox during the Last Glacial  
991 Maximum, *Nature Ecology & Evolution*, 2, 640-649, 2018.

992 Zhu, D., Peng, S. S., Ciais, P., Viovy, N., Druel, A., Kageyama, M., Krinner, G., Peylin, P., Ottlé, C., Piao,  
993 S. L., Poulter, B., Schepaschenko, D., and Shvidenko, A.: Improving the dynamics of Northern  
994 Hemisphere high-latitude vegetation in the ORCHIDEE ecosystem model, *Geoscientific Model*  
995 *Development*, 8, 2263-2283, 2015.  
996  
997

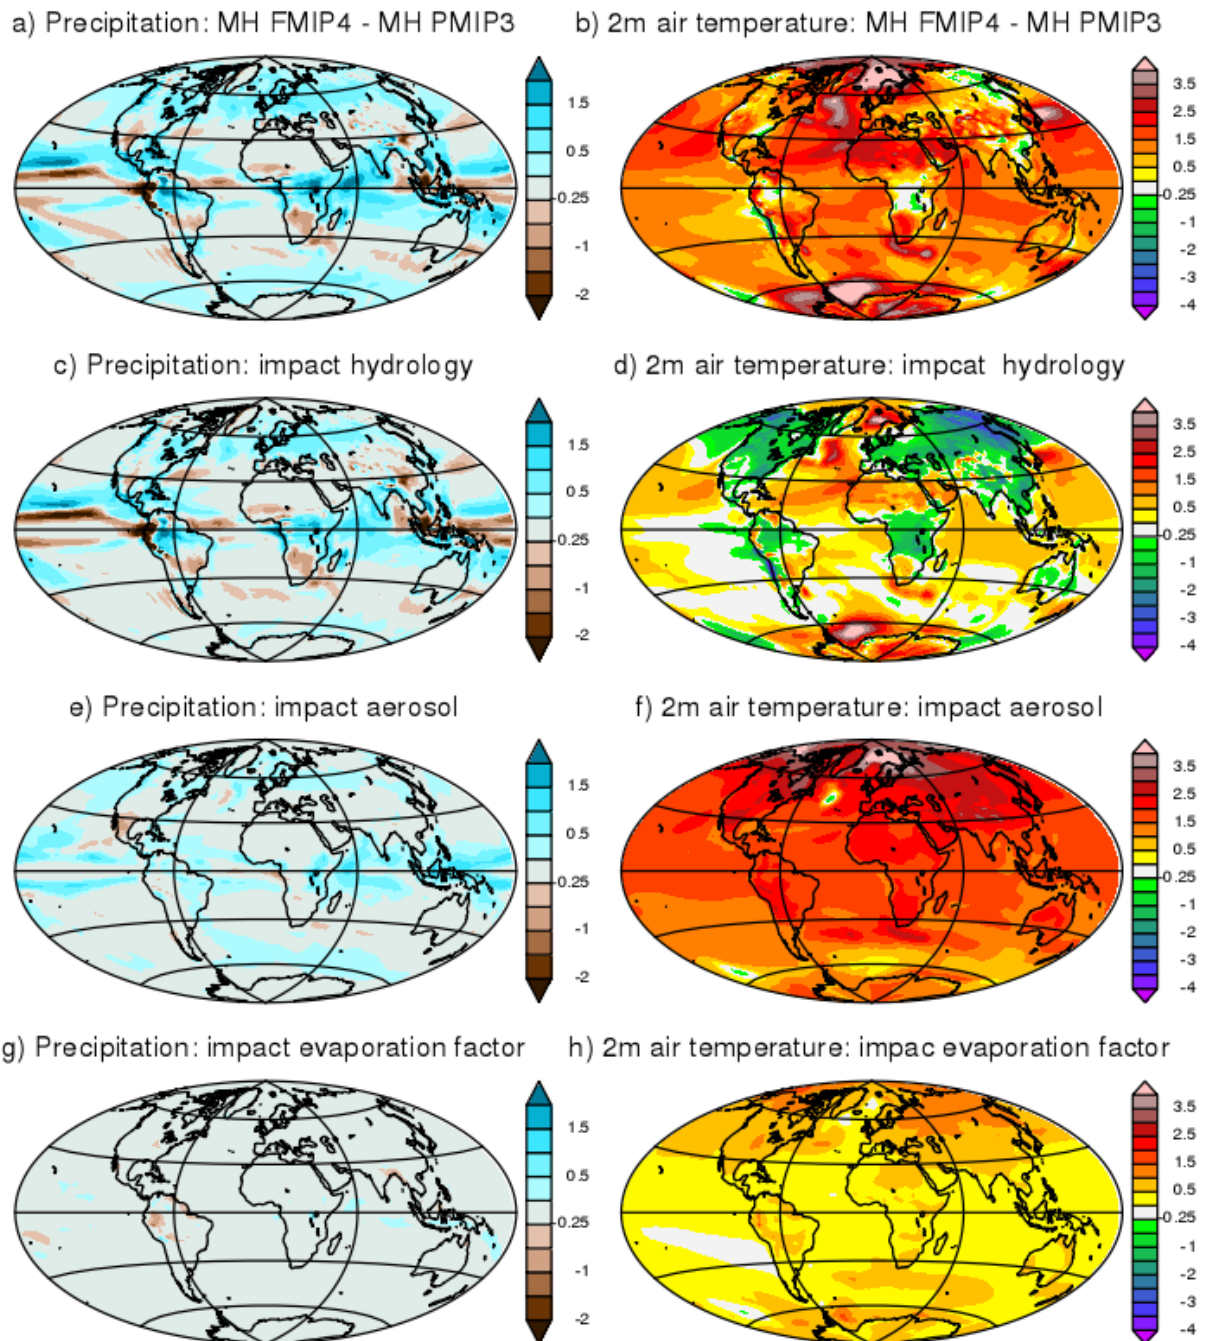

998  
 999  
 1000  
 1001  
 1002

Fig. 1: Mid Holocene annual mean precipitation ( $\text{mmd}^{-1}$ ) and 2m air temperature ( $^{\circ}\text{C}$ ) differences between a) FPMIP4 and PMIP3, b) L11 and PMIP3, c) L11Aer and L11 and d) L11AerAV and L11Aer. See Table 1 and text for the details about the different simulations.

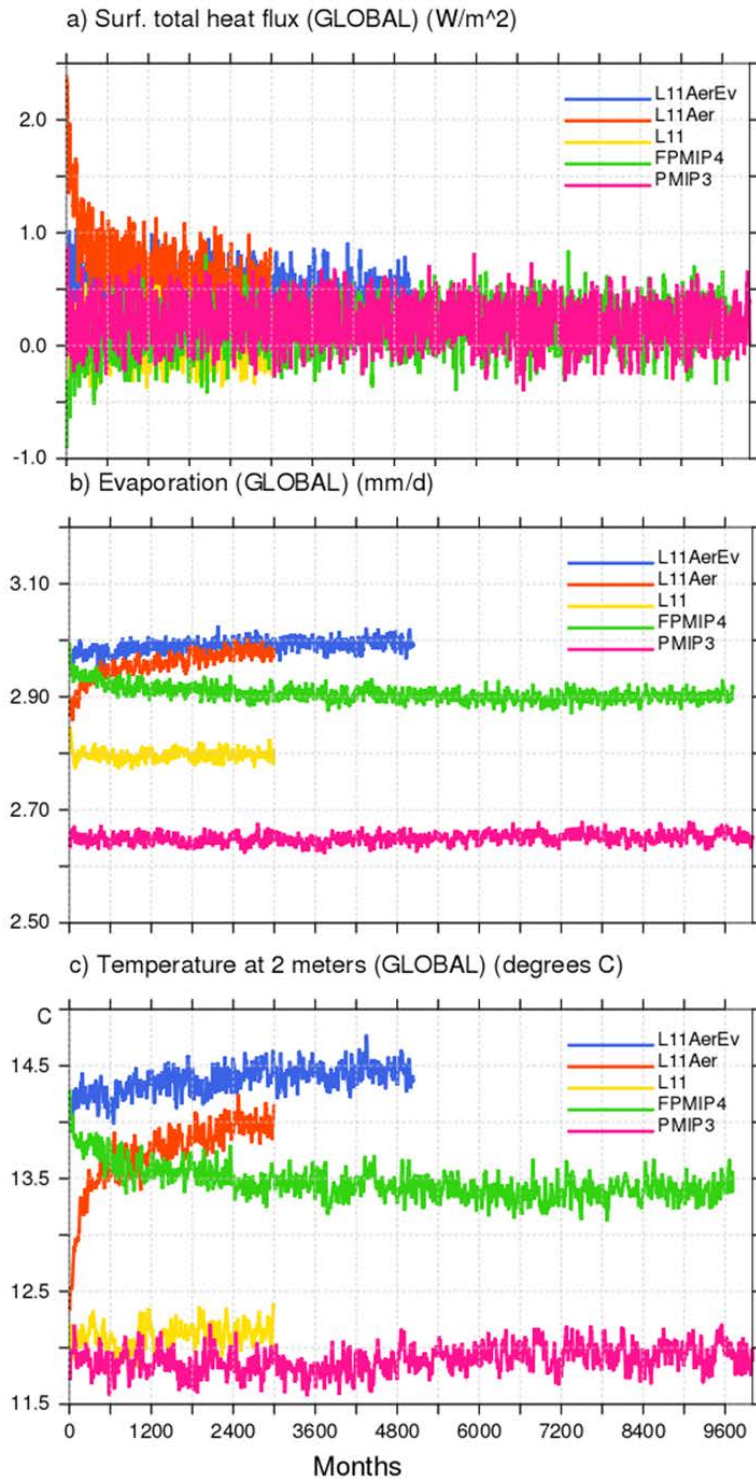

1003  
 1004  
 1005  
 1006  
 1007  
 1008  
 1009  
 1010

Figure 2: Illustration of the effect of the different adjustments made to produce mid-Holocene simulations with the modified version of the IPSLCM5A-MR version of the IPSL model in which the land surface model ORCHIDEE includes a different soil hydrology and snow models (see text for details). The three panels show the global average of a) net surface heat flux ( $W.m^{-2}$ ), b) evaporation ( $kg.m^{-2}$ ), and c) 2m air temperature ( $^{\circ}C$ ). The different color lines represent the results for the different simulations reported in Table 1.

1011  
 1012  
 1013  
 1014  
 1015  
 1016

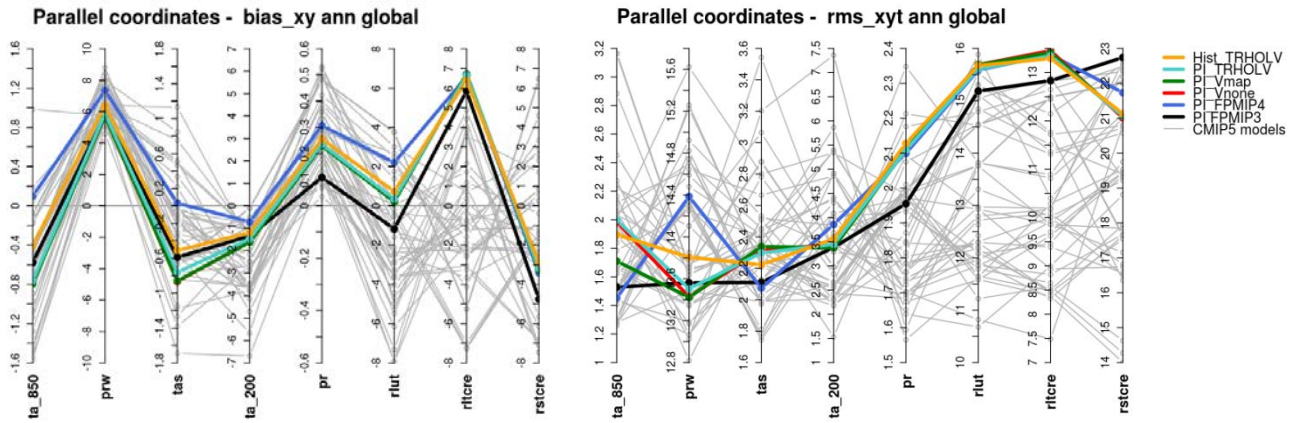

1017  
 1018  
 1019  
 1020  
 1021  
 1022  
 1023  
 1024  
 1025

Figure 3. a) Annual mean global model bias (bias\_xy) and b) spatio-temporal root mean square differences (rms\_xyt) computed on the annual cycle (twelve climatological months) over the globe for the different pre-industrial simulations considered in this manuscript (colored lines) and individual simulations of the CMIP5 multi-model ensembles (grey lines). The metrics for the different variables are presented as parallel coordinates, each of them having their own vertical axis with corresponding values. In these plots ta stands for temperature ( $^{\circ}\text{C}$ ) with s for surface, 850 and 200 for 850 and 300 hPa, prw for total water content, pr for precipitation ( $\text{mm d}^{-1}$ ), rlut, for outgoing long wave radiation, rltcre and rltcre for the cloud radiative effect at the top of the atmosphere in the short wave and long wave radiation respectively ( $\text{Wm}^{-2}$ ).



1026  
1027  
1028  
1029  
1030  
1031  
1032  
1033

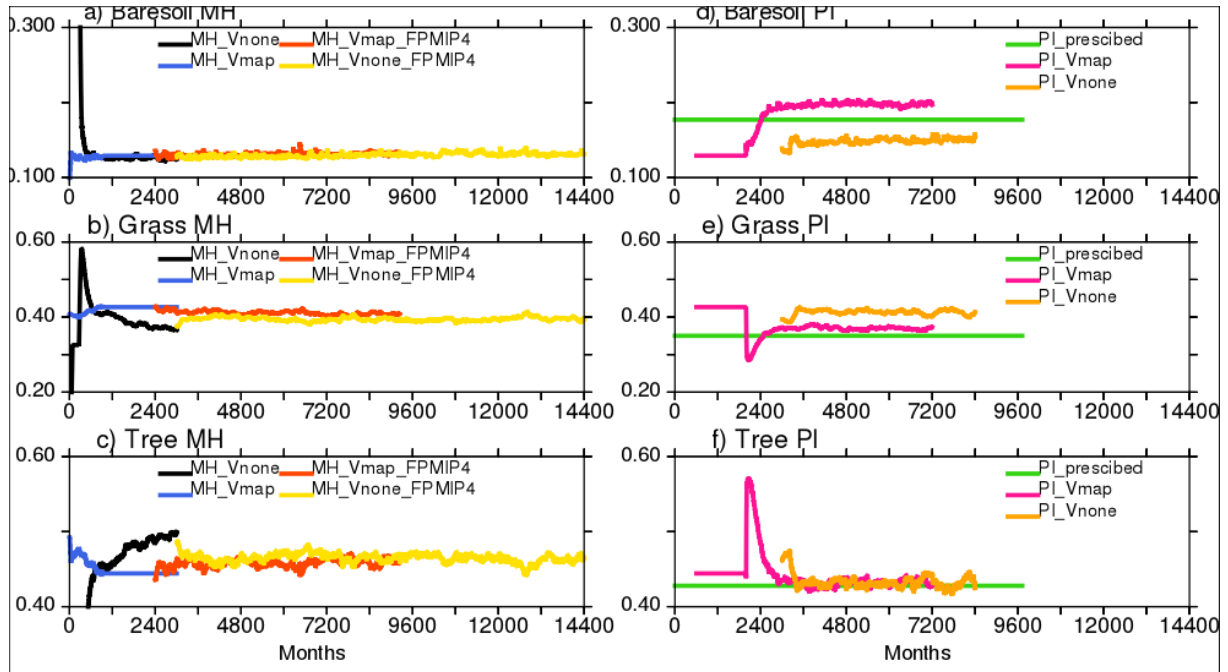

1034  
1035  
1036  
1037  
1038  
1039  
1040  
1041  
1042  
1043  
1044  
1045  
1046  
1047

Figure 4. Long term adjustment of vegetation for mid Holocene when starting from bare soil (Vnone) or from a vegetation map (Vmap). The 13 ORCHIDEE PFT have been gathered as bare soil, grass, tree and land-use. When the dynamical vegetation is active only natural vegetation is considered. Land-use is thus only present in one simulation, corresponding to a pre-industrial map used as reference in the IPSL model (Dufresne et al. 2013). The corresponding vegetation is referred to as PI\_prescribed. Following Table 2, MH and PI refer to midHolocene and Pre industrial control simulations respectively. The x axis is in months, starting from 0.

1048  
1049  
1050  
1051

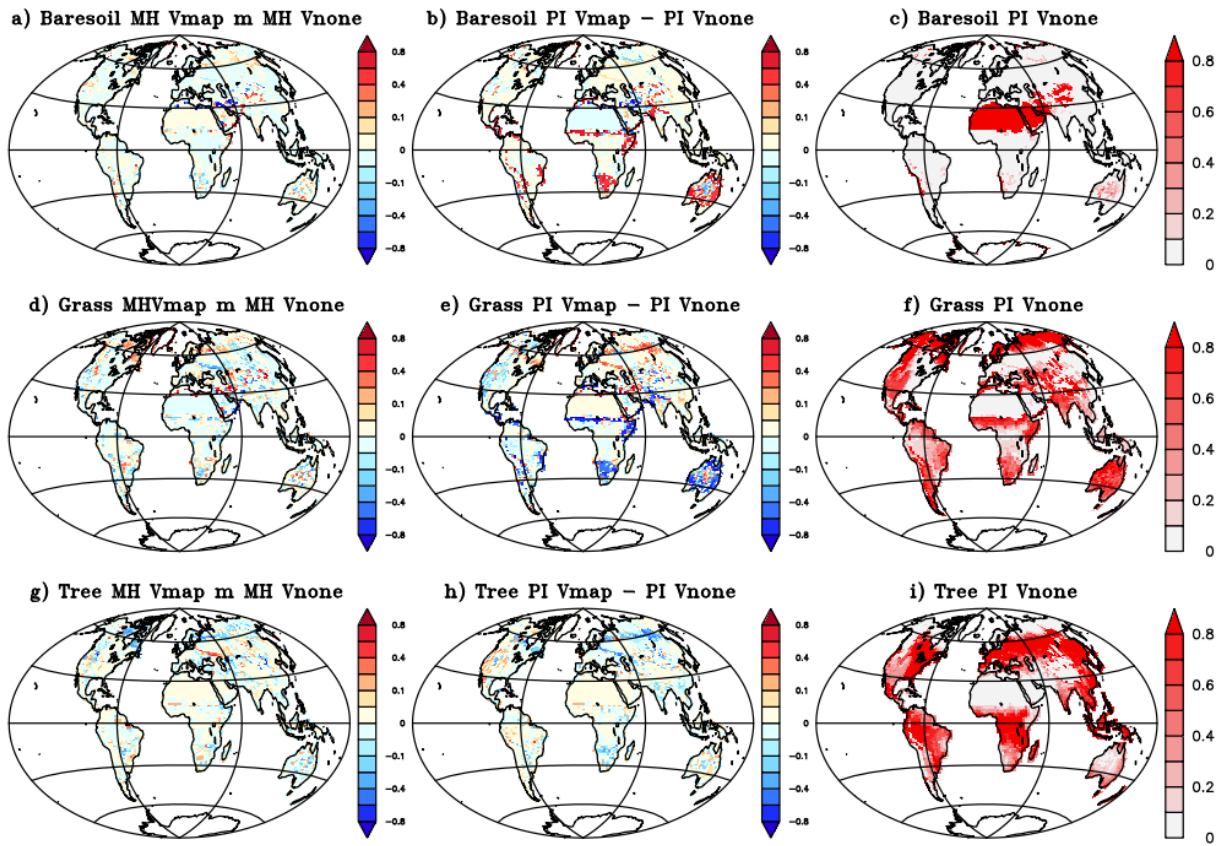

1052  
1053  
1054  
1055  
1056  
1057  
1058  
1059  
1060  
1061

Figure 5: Vegetation maps obtained with the two different initial states for a) d) g) mid Holocene simulations, b) e) h) pre-industrial simulations and c) f) i) pre-industrial simulation for Vnone. Vmap stands for simulations where the mid-Holocene vegetation has been initialized from a vegetation map and Vnone for simulations where the mid-Holocene has been initialized from bare soil. For simplicity we only consider fractions of a) b) c) bare soil, d) e) f) grass and g) h) i) trees.



1062  
1063  
1064  
1065  
1066  
1067

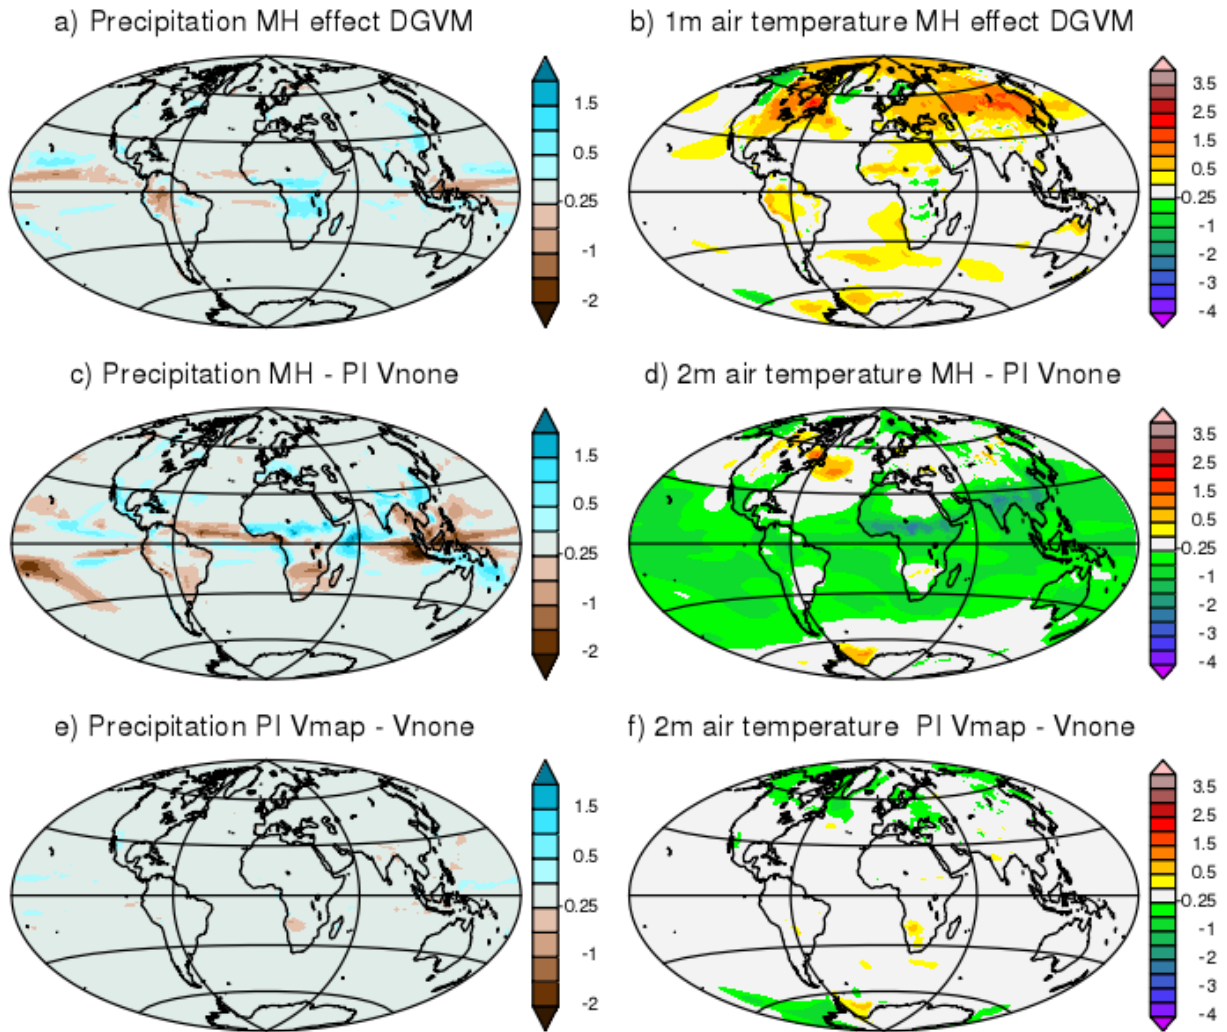

1068  
1069  
1070  
1071  
1072  
1073  
1074  
1075  
1076  
1077  
1078

Figure 6: Impact of the dynamical vegetation and initialization of vegetation on the simulated climate. Differences for annual mean a) c) e) precipitation (mm.d-1) and b) d) f) 2m air temperature (°C) between a) and b) the mid Holocene simulation with dynamical vegetation (MH-VNone) and the mid Holocene simulation without (MH FPMIP4), d) and d) the mid Holocene (MH-Vnone) and the pre-industrial (PI-Vnone) simulations with bare soil as initial state for vegetation, and e) and f) the two pre-industrial simulations initialized from bare soil (PI-Vnone) or a vegetation map for vegetation (PI-Vmap). See table 2 and text for details on the simulations.

1079  
 1080  
 1081  
 1082  
 1083  
 1084  
 1085  
 1086  
 1087

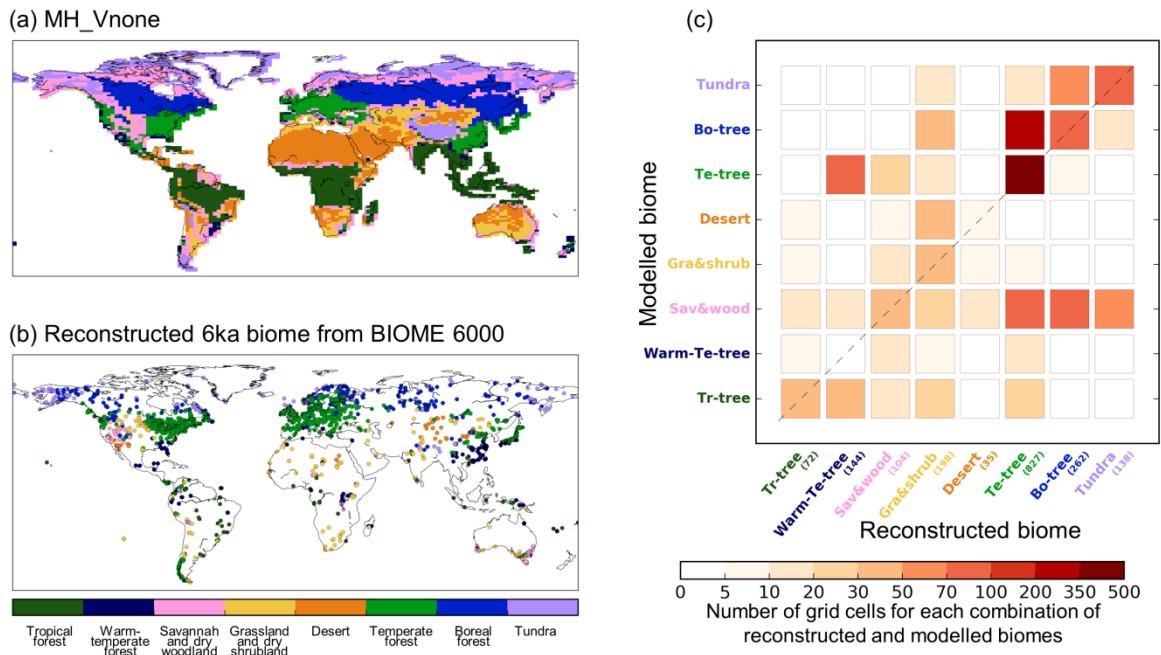

1088  
 1089  
 1090  
 1091  
 1092  
 1093  
 1094  
 1095  
 1096  
 1097  
 1098

Figure 7: (a) Simulated megabiome distribution by MH\_Vnone, converted from the modelled PFT properties using the default algorithm described in Figure A1. (b) Reconstructions in BIOME 6000 DB version 1 (Harrison, 2017). (c) Number of pixels where reconstruction is available and the model matches (or does not match) the data. Note that multiple reconstruction sites may be located in the same model grid cell, in which case we did not group them so that each site was counted once. Numbers in parenthesis on the x axis in c) represent the number of sites for each biome type.

1099  
1100  
1101  
1102  
1103  
1104  
1105  
1106

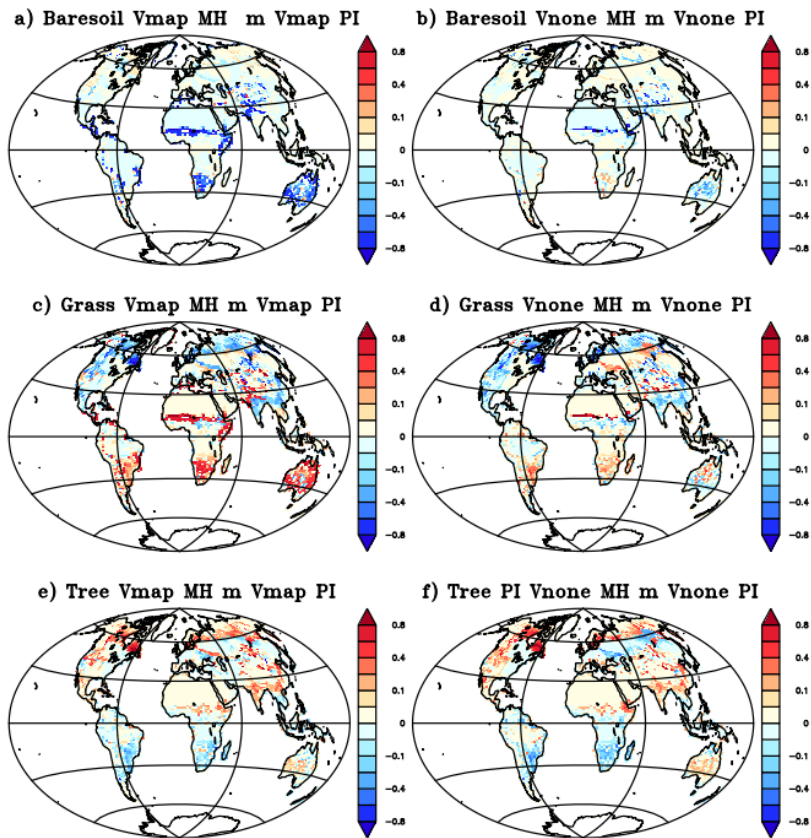

1107  
1108  
1109  
1110  
1111  
1112  
1113  
1114

Figure 8: Comparison of the change in vegetation between mid Holocene and preindustrial climate in the two sets of experiments where the only difference is the way vegetation has been initialised for the mid-Holocene simulation. In a) c) e) Vmap correspond to simulations where the MH simulation has been initialized from a map and in b) d) f) Vnone to simulations where it has been initialized from baresoil. For simplicity we only consider fractions of a) b) bare soil, c) d) grass and e) f) trees.

1115  
1116  
1117  
1118  
1119

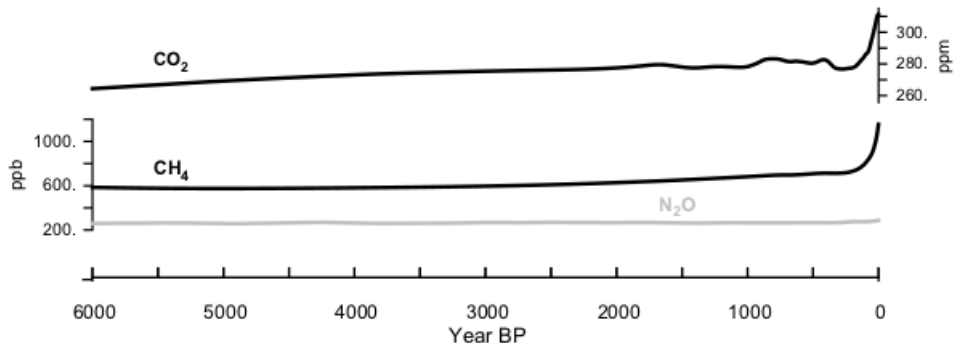

1120  
1121  
1122  
1123  
1124  
1125  
1126

Figure 9: Evolution of trace gazes : CO<sub>2</sub> (ppm), CH<sub>4</sub> (ppb) and N<sub>2</sub>O (ppb), following Otto-Bliesner et al. (2017).

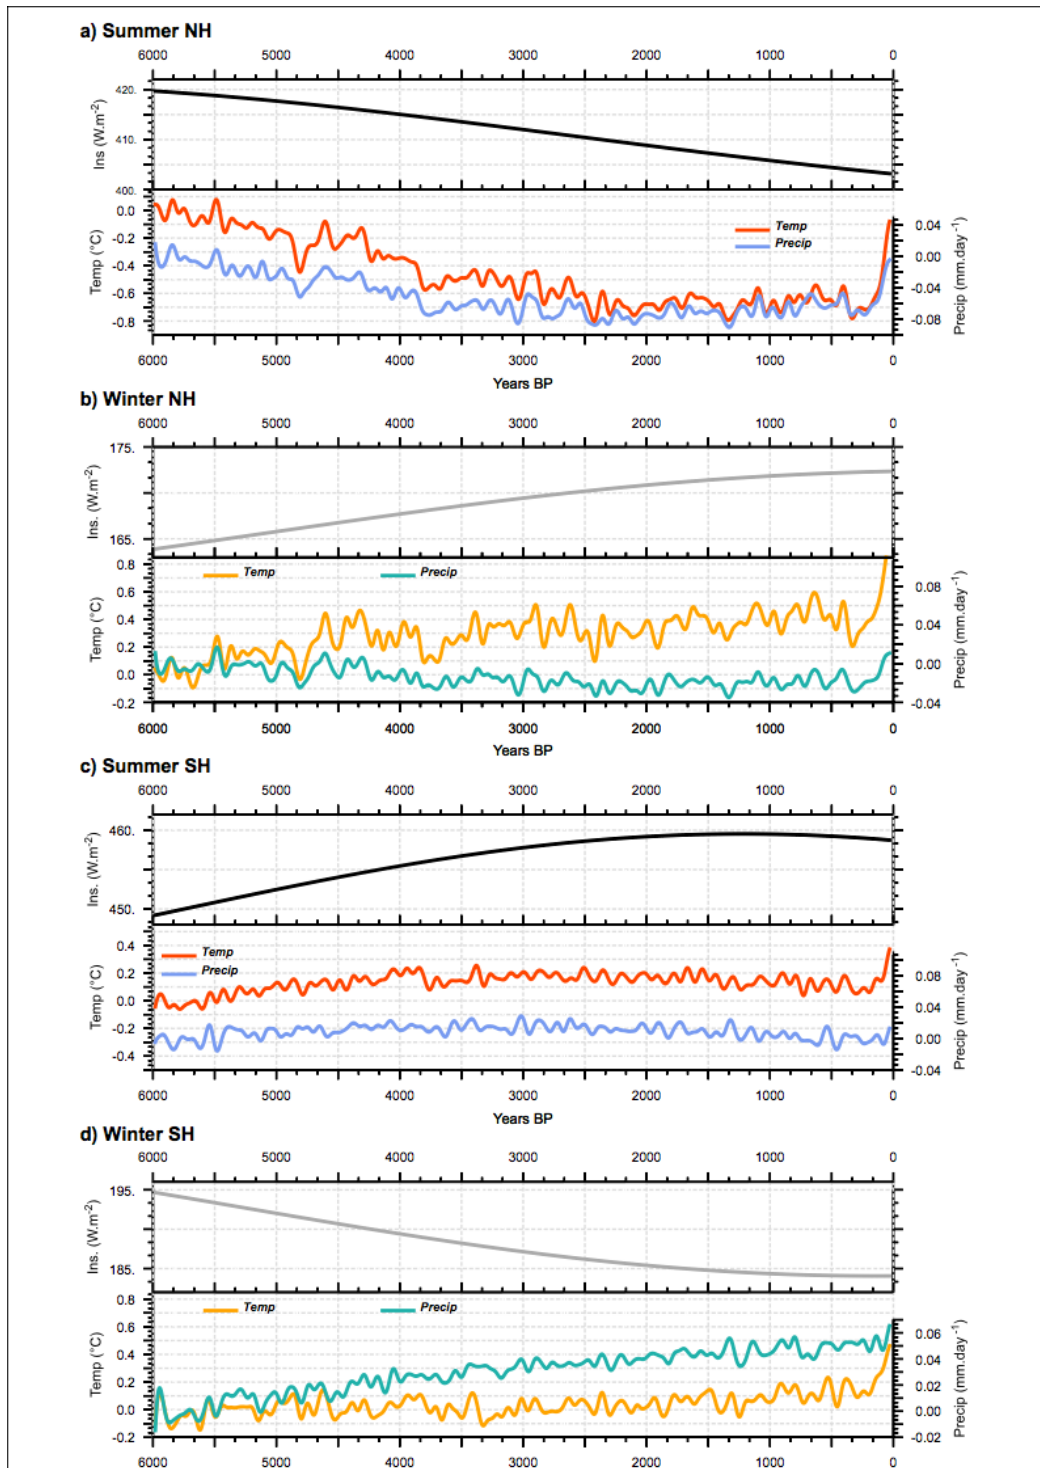

1127

1128 Figure 10. Long term evolution of incoming solar radiation at the top of the atmosphere (TOA)(Wm<sup>-2</sup>, top panel)  
 1129 and associated response of temperature (°C) and precipitation (mm.y<sup>-1</sup>) expressed as a difference with the  
 1130 6000 year PB initial state and smoothed by a 100 year running mean) for a) NH Summer, b) Northern  
 1131 hemisphere winter, c) Southern Hemisphere summer, and d) Southern Hemisphere winter. Temperatures are  
 1132 plotted in red and precipitation in blue for summer, and they are respectively plotted in orange and green for  
 1133 winter. NH Summer and SH Winter correspond to June to September averages whereas NH winter and SH  
 1134 summer correspond to December to March averages. All curves, except insolation have been smoothed by a  
 1135 100 year running mean.  
 1136

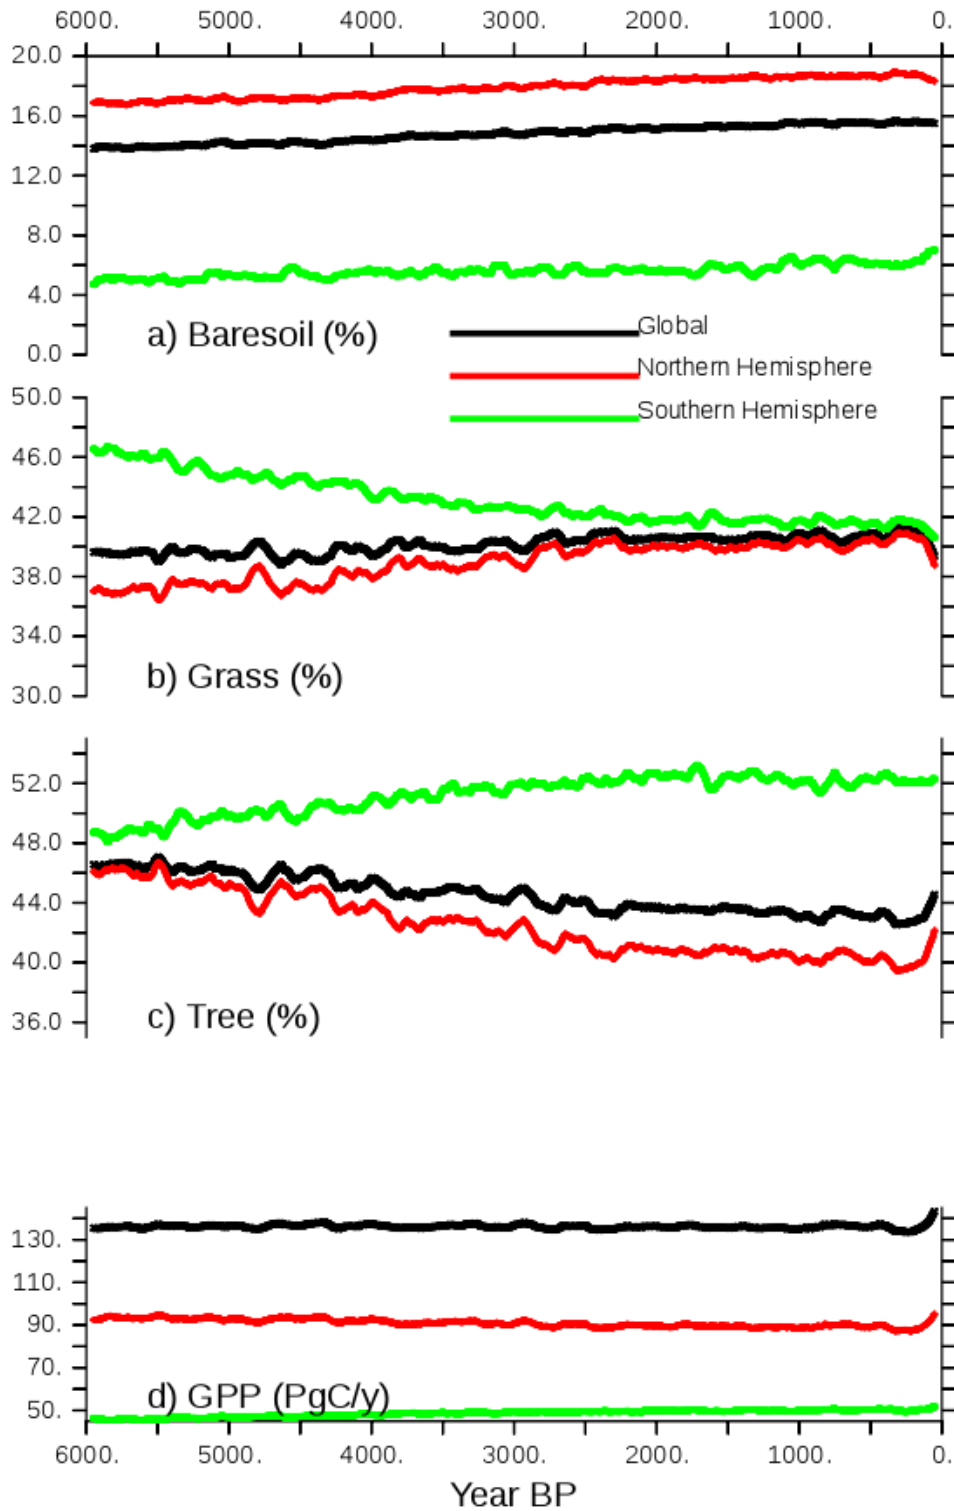

1137

1138 Figure 11: Long term evolution of the simulated a) baresoil, b) grass and c) tree covers, expressed as the  
 1139 percentage (%) of Global, Northern Hemisphere or Southern Hemisphere continental areas, and d) GPP (PgC/y)  
 1140 over the same regions. Annual mean values are smoothed by a 100 year running mean.

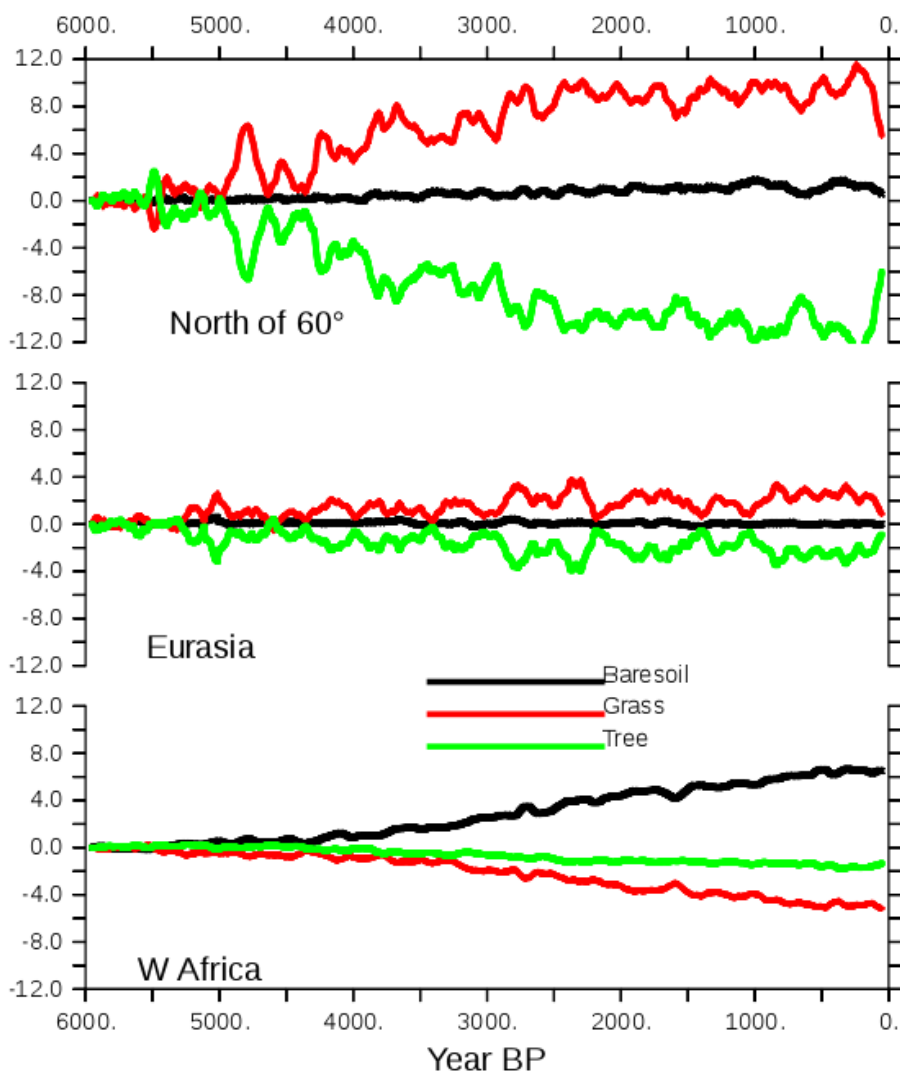

1141

1142 Figure 12 : Long term evolution of Baresoil, grass and Tre, expressed as the % of land cover North of 60°N, over  
 1143 Eurasia and over West Africa. The different values are plotted as differences with the first 100 year averages. A  
 1144 100 year running mean is applied to the curves before plotting.

1145

1146

1147  
1148  
1149  
1150

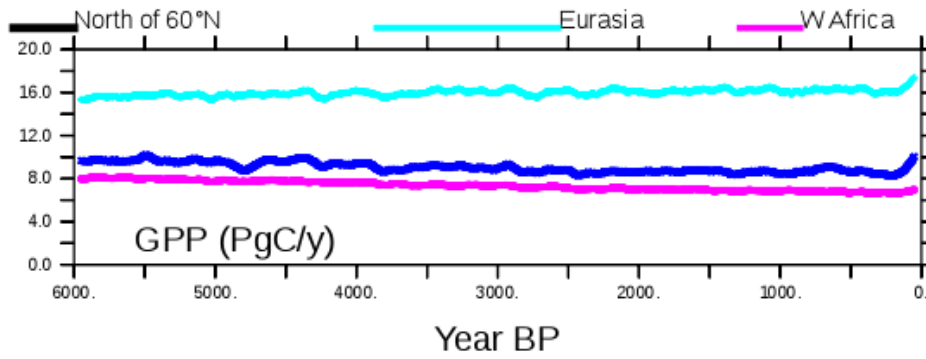

1151  
1152  
1153  
1154  
1155  
1156

Figure 13. Long term evolution of total GPP (PgC/y for land surfaces north of 60°N (blue) Eurasia (cyan), and W Africa (pink). Annual mean values are smoothed by a 100 yr running mean.



1157  
1158  
1159  
1160  
1161  
1162  
1163  
1164

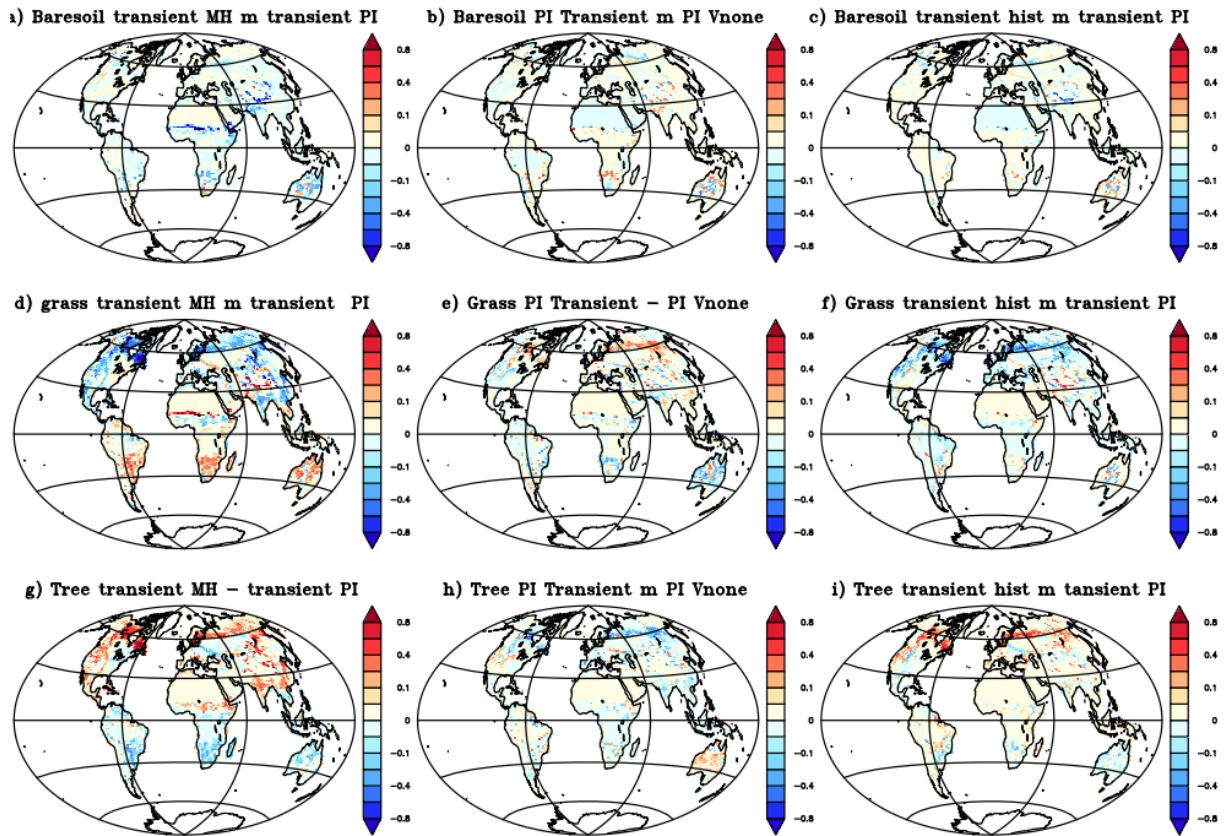

1165  
1166  
1167  
1168  
1169  
1170  
1171  
1172  
1173  
1174  
1175

Figure 14: Vegetation map comparing a) the Mid Holocene (1<sup>st</sup> 50 years) and the pre-industrial (50 year around 1850 AC (last 150 to 100 years) periods of the transient simulation , b) the difference between pre-industrial climate for the transient simulation and the Vnone simulations, and c) the differences between the historical period (last 50 years) and the pre-industrial period of the transient simulation. For simplicity we only consider bare soil (top), grass (middle) and tree (bottom).

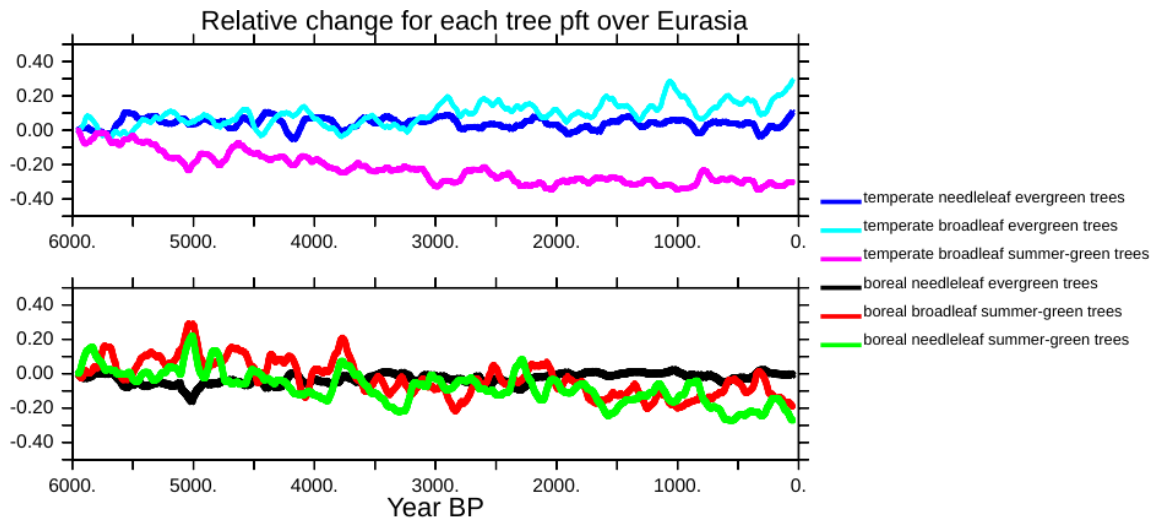

1176

1177 Figure 15 : Evolution of the different tree PFTs in Eurasia, expressed as the percentage change compared to  
 1178 their 6000 year BP initial state.. Each color line stands for a different PFT. Values have been smoothed by a 100  
 1179 year running mean.

1180

1181  
 1182  
 1183

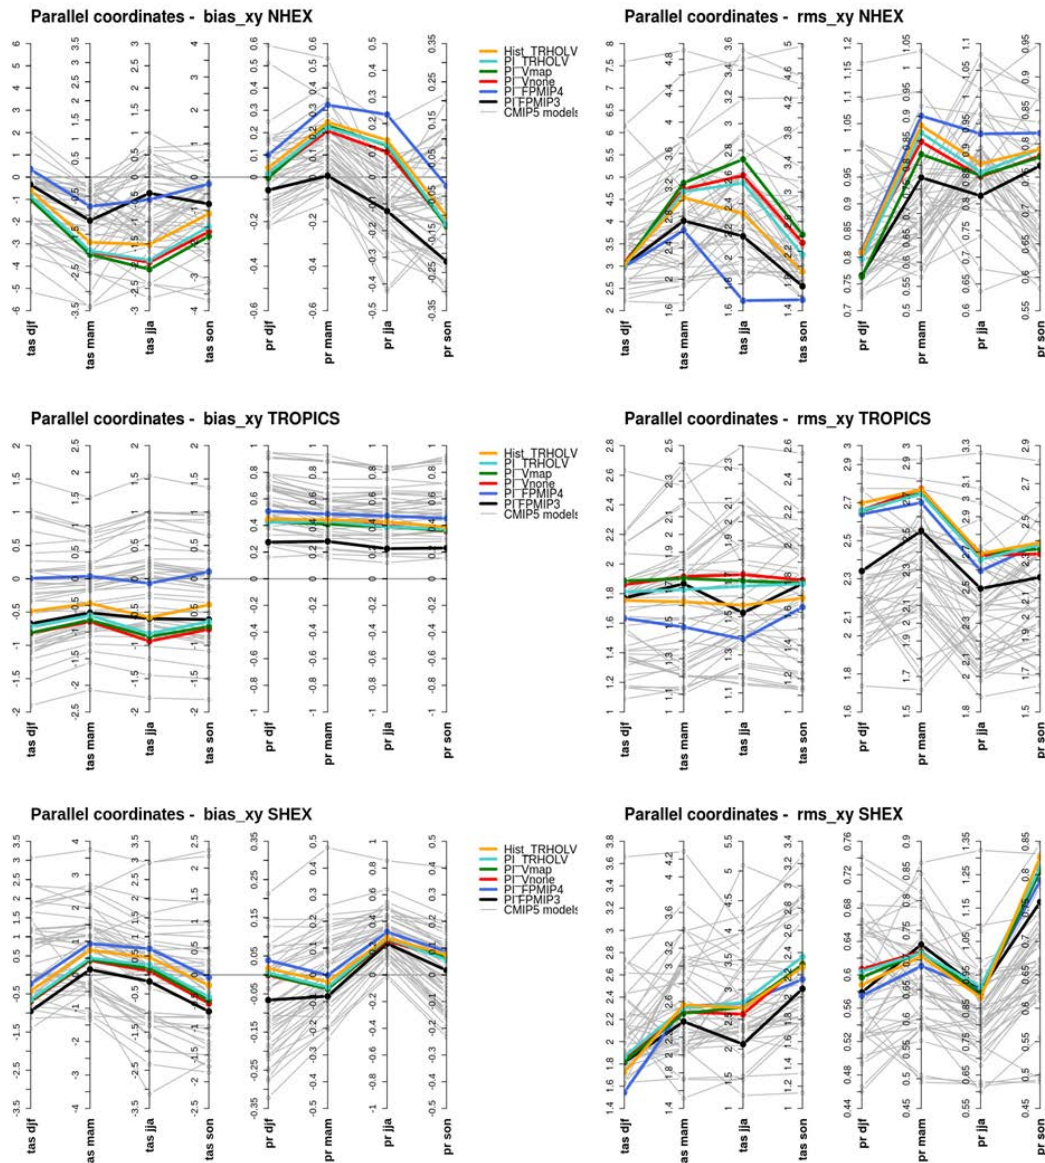

1184  
 1185  
 1186  
 1187  
 1188  
 1189  
 1190  
 1191  
 1192

Figure A1: Parrallel coordinate representation of metrics highlighting model mean bias (left column) and spatial root mean square differences (right column) against observations for the four climatological seasons (December to February, djf; Mars to May, mam; June to August, jja ; September to November, son) for surface air temperature (tas, °C) and precipitation, mmd<sup>-1</sup>) and Northern Hemisphere extra tropics (NHEX, 20°N-90°N), Tropics (20°S-20°N), and Southern Hemisphere extra tropics (SHEX 90°S-20°S). Each color line stands for a simulations discussed in this manuscript. The results of the different CMIP5 simulations (grey lines) are included for comparison.

(a) Algorithm to convert the modelled PFT properties into the 8 mega-biomes provided by BIOME 6000

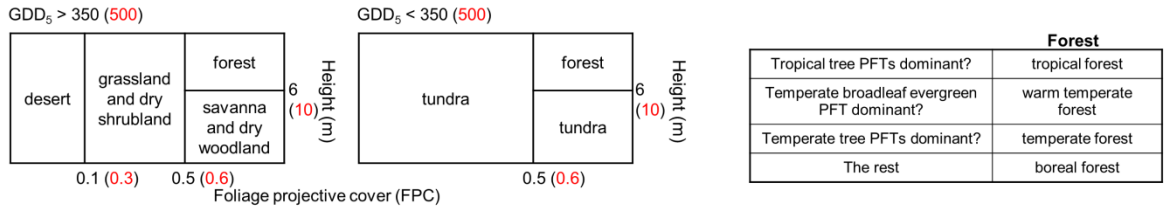

(b) Simulated mega-biome distribution

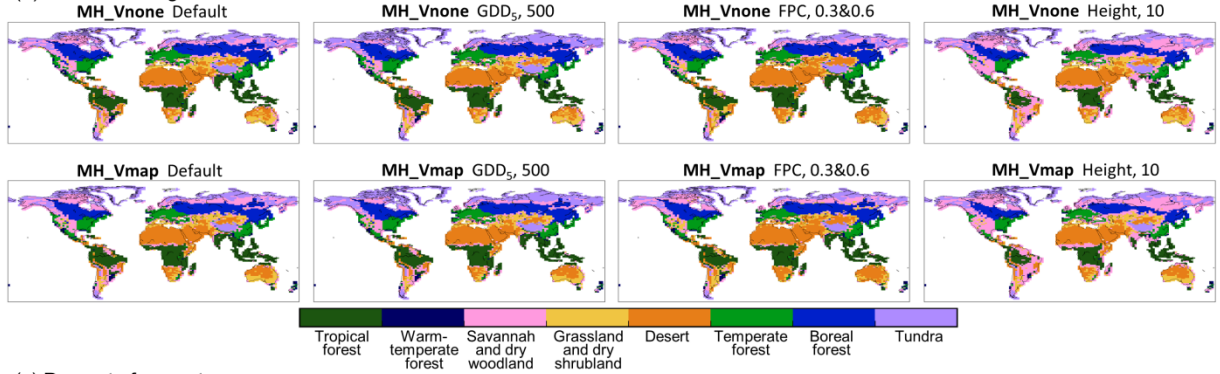

(c) Percent of correctness

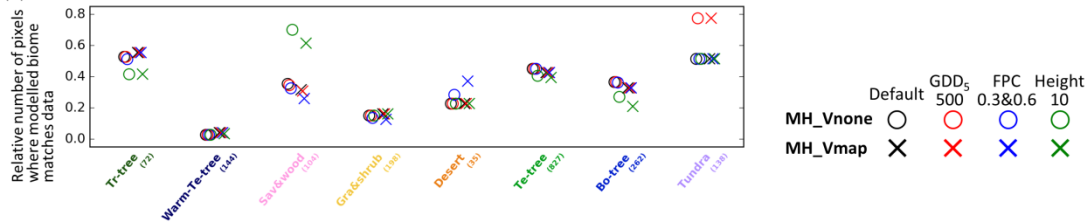

1193

1194

1195

1196

1197

1198

1199

1200

1201

1202

Figure A2 : (a) Algorithm to convert the modelled PFT properties into the eight megabiomes provided by BIOME 6000 DB version 1. The default thresholds (in black) are the same as Zhu et al. (2018), while different values (in red) are tested:  $GDD_5$  (annual growing degree days above 5 °C) of 500 K days (Joos et al., 2004), FPC (foliage projective cover) of 0.3 and 0.6 (Prentice et al., 2011) Height (average height of all existing tree PFTs) of 10 m (Prentice et al., 2011). (b) Simulated megabiome distribution by MH\_Vnone and MH\_Vmap, using different conversion methods in (a). (c) The number of pixels where modelled megabiome matches data for each biome type, divided by the total number of available sites for that biome type.
